1 **Analytical validation of a multi-protein, serum-based assay for disease activity**  
2 **assessments in multiple sclerosis**

3  
4 Ferhan Qureshi,<sup>1\*</sup> Wayne Hu,<sup>1\*</sup> Louisa Loh,<sup>1</sup> Hemali Patel,<sup>1</sup> Maria DeGuzman,<sup>1</sup>  
5 Michael Becich,<sup>1†</sup> Fatima Rubio da Costa,<sup>1†</sup> Victor Gehman,<sup>1†</sup> Fujun Zhang,<sup>1†</sup>  
6 John Foley,<sup>2</sup> Tanuja Chitnis<sup>3</sup>

7 <sup>1</sup>Octave Bioscience, Inc., Menlo Park, CA, USA

8 <sup>2</sup>Rocky Mountain Multiple Sclerosis Clinic, Salt Lake City, UT, USA

9 <sup>3</sup>Brigham and Women's Hospital, Harvard Medical School, Boston, MA, USA

10 \*These authors contributed equally to this work

11 †Employee of Octave Bioscience, Inc., at the time the study was completed

12

13 **Correspondence**

14 Ferhan Qureshi

15 1440 Obrien Drive, Suite B

16 Menlo Park, CA 94025, USA

17 Email: fqureshi@octavebio.com

18 Phone: 650-224-3072

19 Fax: 650-479-8876

20

21 **Abbreviations:**

22 %CV, percent coefficient of variation; APLP1, amyloid beta precursor-like protein 1;

23 CCL20, C-C motif chemokine ligand 20; CD6, cluster of differentiation 6; CDCP1,

24 CUB domain-containing protein 1; C<sub>max</sub>, maximum concentration; CNS, central

25 nervous system, CNTN2, contactin 2; COL4A1, collagen type IV alpha-1; conc,

26 concentration; CSF, cerebrospinal fluid; CXCL9, chemokine (C-X-C motif) ligand 9

27 (MIG); CXCL13, chemokine (C-X-C motif) ligand 13; DMT, disease-modifying

28 therapy; DNA, deoxyribonucleic acid; FLRT2, fibronectin leucine-rich repeat

29 transmembrane protein; Gd+, gadolinium positive; GFAP, glial fibrillary acidic protein;

30 GH, growth hormone; HAMA, human anti-mouse antibodies; HCl, hydrochloride; IL-

31 12 $\beta$ , interleukin-12 subunit beta; LLOQ, lower limit of quantitation; LOQ, limit of

32 quantitation; mAb, monoclonal antibody; Max, maximum; Min, minimum; MOG,

medRxiv preprint reports new research that has not been certified by peer review and should not be used to guide clinical practice.

33 myelin oligodendrocyte glycoprotein; MRI, magnetic resonance imaging; MS, multiple  
34 sclerosis; MSDA, Multiple Sclerosis Disease Activity; Na, sodium; NfL, neurofilament  
35 light chain; OPG, osteoprotegerin; OPN, osteopontin; PCR, polymerase chain  
36 reaction; PEA, Proximity Extension Assay; PRTG, protogenin; qPCR, quantitative  
37 polymerase chain reaction;  $R^2$ , coefficient of determination; RA, rheumatoid arthritis;  
38 RF, rheumatoid factor; SD, standard deviation; SERPINA9, serpin family A member  
39 9; TNFRSF10A, tumor necrosis factor receptor superfamily member 10A (TRAIL-R1);  
40 TNFSF13B, tumor necrosis factor superfamily member 13B (BAFF); ULOQ, upper  
41 limit of quantitation; VCAN, versican core protein

42

43 **Key words:**

44 Analytical characterization, analytical validation, biomarker, multiple sclerosis,  
45 proximity extension assay

46

47 **Total word count:** 3964 (5000 maximum)

48 **Running head:** Analytical Validation of a Serum-Based Assay for Disease  
49 Activity Assessments in Multiple Sclerosis

50 **Previous presentation:** Part of this work, namely analytical validation of the  
51 individual biomarkers in the MSDA Test, was previously  
52 presented at the ACTRIMS 2021 Forum, Virtual (February  
53 25–27, 2021) and analytical validation of the Disease  
54 Activity Score and 4 Disease Pathway Scores, was  
55 previously presented at the ACTRIMS 2022 Forum, West  
56 Palm Beach, Florida (February 24–26, 2022)

57 **Clinical relevance**

58 Multiple sclerosis (MS) is a chronic, neurodegenerative, immune-mediated disease of  
59 the CNS. MS has a complex disease course with variable clinical outcomes. Although  
60 many treatments are effective in early stages of the relapsing/remitting form of the  
61 disease, early diagnosis and treatment are critical to managing disease activity and  
62 slowing disease progression. One of the major areas of focus in MS research is the  
63 identification of biomarkers in biological fluids, such as cerebrospinal fluid or blood, to  
64 track pathogenesis, disease activity, and disease progression, which can lead to  
65 individualized disease management and improved quality of care. Currently, there  
66 are no validated clinical tests that leverage multiple blood biomarkers to track disease  
67 activity or progression in patients with MS. Herein, we describe the analytical  
68 characterization and validation of a multi-protein, serum-based assay panel  
69 developed using Olink® PEA methodology. We demonstrate the extensive  
70 characterization of this multi-protein, serum-based assay and establish its accuracy,  
71 precision, sensitivity, and robustness. This report will be followed by a  
72 complementary clinical validation study investigating the correlation between the  
73 proteomic assay results and relevant clinical and radiographic endpoints for patients  
74 with MS.

75 **Abstract**

76 **Purpose:** To characterize and analytically validate the MSDA Test, a multi-protein,  
77 serum-based biomarker assay developed using Olink® PEA methodology.

78 **Experimental design:** Two lots of the MSDA Test panel were manufactured and  
79 subjected to a comprehensive analytical characterization and validation protocol to  
80 detect biomarkers present in the serum of patients with MS. Biomarker  
81 concentrations were incorporated into a final algorithm used for calculating four  
82 Disease Pathway scores (Immunomodulation, Neuroinflammation, Myelin Biology,  
83 and Neuroaxonal Integrity) and an overall Disease Activity score.

84 **Results:** Analytical characterization demonstrated that the multi-protein panel  
85 satisfied the criteria necessary for a fit-for-purpose validation considering the assay's  
86 intended clinical use. This panel met acceptability criteria for 18 biomarkers included  
87 in the final algorithm out of 21 biomarkers evaluated. VCAN was omitted based on  
88 factors outside of analytical validation; COL4A1 and GH were excluded based on  
89 imprecision and diurnal variability, respectively. Performance of the four Disease  
90 Pathway and overall Disease Activity scores met the established acceptability  
91 criteria.

92 **Conclusions and clinical relevance:** Analytical validation of this multi-protein,  
93 serum-based assay is the first step in establishing its potential utility as a quantitative,  
94 minimally invasive, and scalable biomarker panel to enhance the standard of care for  
95 patients with MS.

96 **What is known and what is new in your work?**

97 **What's known**

- 98 • Multiple sclerosis (MS) has a complex disease course with variable clinical  
99 outcomes; early diagnosis and treatment are critical to management of MS.
- 100 • One key focus in MS research is the identification of biomarkers in biological  
101 fluids, such as cerebrospinal fluid or blood, to track pathogenesis, disease activity,  
102 and disease progression, which may lead to individualized disease management  
103 and improved quality of care.
- 104 • There currently are no validated clinical tests that leverage multiple blood  
105 biomarkers to track disease activity or progression in patients with MS.

106 **What's new**

- 107 • The MS Disease Activity (MSDA) Test is a multi-protein, serum-based biomarker  
108 assay designed to quantitatively measure disease activity using the protein levels  
109 of biomarkers present in the serum of patients with MS.
- 110 • In this study, we evaluated 21 biomarkers, 18 of which were selected for inclusion  
111 in the MSDA Test, and extensively characterized the MSDA Test (individual  
112 biomarkers and algorithmic scores) by establishing the accuracy, precision,  
113 sensitivity, and robustness of the assay.
- 114 • This study serves as a critical first step in the validation of this multi-protein,  
115 serum-based assay, which will be a quantitative, minimally invasive, and scalable  
116 tool to improve MS disease management.

117 **1 INTRODUCTION**

118 Multiple sclerosis (MS) is a chronic, neurodegenerative, immune-mediated disease of  
119 the CNS, characterized by inflammatory demyelination and neuronal damage.[1,2]

120 MS has a complex disease course with variable symptoms or manifestations that can  
121 range from mild and self-limiting to severe.[1] The clinical course, after the first

122 clinical manifestation of the disease, or clinically isolated syndrome, can vary.[3] The

123 damage caused by MS typically leads to relapses, or acute attack of symptoms,

124 followed by progressive disease.[4] Most treatments are effective in early stages of

125 the relapsing/remitting form of the disease;[4,5] however, a delay in treatment can

126 lead to irreversible damage.[6] Studies show that the extent of remyelination in early

127 MS is greater than in chronic MS.[7] Clinical studies are underway to explore

128 treatments targeting remyelination, which may slow or offset disease progression.[8]

129 The McDonald Criteria, designed to improve the accuracy of MS diagnosis,

130 established the use of MRI to show the accrual of lesions over time and space.[9]

131 The revised McDonald Criteria substituted CSF oligoclonal immunoglobulin G bands

132 for the second clinical/MRI finding.[10] Nonetheless, use of any of these

133 assessments do not always accurately predict disease activity, course, progression,

134 recurrence, or response to treatment.[11-13] As such, there is an unmet clinical need

135 for objective and quantitative measures that can accurately diagnose MS, monitor

136 disease activity, and promote individualized disease management.[13,14]

137 One major area of focus in MS is the identification of biomarkers in biological

138 fluids, such as CSF or blood, to track pathogenesis, disease activity, and

139 progression.[14,15] One of the key therapeutic strategies in MS is to reduce relapse,

140 lesions, and brain atrophy at all disease stages.[4] As a result, new biomarkers for

141 early MS diagnosis and disease activity monitoring can lead to prevention of disease

142 progression, potentially reducing the patient's level of disease worsening.[14] The  
143 dynamic range of proteins in CSF presents challenges when differentiating small  
144 disease-specific changes from inherent inter-individual differences, especially as it  
145 relates to methodological variations.[16,17] CSF collection also requires invasive  
146 procedures, such as lumbar puncture. On the other hand, blood-based collection of  
147 biomarkers allows for safe, quick, and easy collection.[14] With these considerations,  
148 detection of biomarkers in blood is a viable and attractive option for the accurate  
149 diagnosis and assessment of disease activity and progression in MS. However, there  
150 currently are no validated clinical tests that leverage multiple blood biomarkers to  
151 track disease activity or progression in patients with MS.[18]

152         Development of multi-protein assays can be challenging. Each protein  
153 biomarker requires specific conditions and methodologies for optimal quantification.  
154 The optimal multi-protein assay should be designed so that stability and integrity of  
155 all biomarker proteins are maintained and optimized to eliminate cross-reactivity.[19]  
156 Larger scale, proteomic techniques allow higher throughput of samples and more  
157 timely readout. However, maintaining robustness, repeatability, and sensitivity is  
158 challenging, yet critical, to the validation of a multi-protein biomarker panel.[20]

159         Analysis of multiple proteins may more accurately represent the various  
160 pathways, processes, and cell types involved in complex disease states and has the  
161 potential to deliver more personalized medicine for MS.[20-23] Single proteins may  
162 not perform well alone as diagnostic or prognostic markers. However, as part of a  
163 multi-protein assay, they may contribute to a clinically useful model when combined  
164 with other proteins and biomarkers.[21] Therefore, multi-protein assay platforms have  
165 been characterized and validated for complex disease states.[19,21,22,24]

166         The MSDA Test is a multi-protein, serum-based biomarker assay designed to  
167 quantitatively measure disease activity using the protein levels of biomarkers present

168 in the serum of patients with MS. Our custom multi-protein assay panel was  
169 developed using the Olink® PEA (Olink Proteomics, Uppsala, Sweden) methodology  
170 described previously (**Figure S1**).[19] Herein, we describe the comprehensive  
171 analytical characterization and validation of the MSDA Test to satisfy the criteria  
172 necessary for a fit-for-purpose validation considering the assay's intended clinical  
173 use.

174

## 175 **2 EXPERIMENTAL SECTION**

### 176 **2.1 Assay development**

177 Twenty-one biomarkers were selected for inclusion in the custom assay panel based  
178 on statistical associations with clinical and radiographic endpoints as demonstrated in  
179 feasibility studies for which >1400 proteins were screened using 2 immunoassay  
180 platforms (**Table S1**). These feasibility studies investigated biomarker associations  
181 (single-protein and multi-protein) in both cross-sectional and longitudinal samples  
182 relative to several radiographic and clinical MS endpoints, including clinically defined  
183 relapse versus remission (exacerbation versus quiescence), the presence and count  
184 of gadolinium-enhanced lesions on a matched MRI, annualized relapse rate, and  
185 Expanded Disability Status Scale. From these studies, the custom panel of 21  
186 proteins was selected with a primary focus on the detection and prediction of disease  
187 activity status. The 21 proteins were chosen based on their statistical significance  
188 relative to the aforementioned endpoints and with the intent to comprehensively  
189 survey the biological pathways, mechanisms, and cell types associated with MS  
190 pathophysiology as determined via literature review, protein-protein interaction  
191 modeling, gene set enrichment, and spatial expression profiling.[25] Dynamic range  
192 of the individual protein assays was considered, as well as the intent to develop a



193 single multi-protein immunoassay panel for which each protein could be measured in  
194 an undiluted serum sample. The MSDA Test algorithm consisting of 18 biomarkers  
195 included in the panel was finalized in a subsequent clinical validation study for which  
196 independent sample sets were analyzed. The final model was trained and validated  
197 relative to the presence and count of gadolinium-enhanced lesions.

198 Serum pools ( $n=4$ ) were included on all runs during assay discovery and  
199 development. They were procured in large volumes, aliquoted, stored at  $-65^{\circ}\text{C}$ , and  
200 run in triplicate. Serum pools were used solely to assess the analytical performance  
201 of the assays and served as process controls to determine acceptability of future  
202 analytical runs. The SD of repeated measurements was applied to the expected  
203 concentrations. Two assay kit lots of the panel were manufactured for which critical  
204 reagents were varied to the extent possible.

## 205 **2.2 Description of the two-layer stacked classifier algorithm for determination** 206 **of the overall Disease Activity score**

207 A two-layer, L2-penalized logistic regression stacked classifier model was developed  
208 and clinically validated in a separate study that optimized the model's performance to  
209 classify serum samples based on the presence of gadolinium-enhancing lesions (0  
210 lesions or  $\geq 1$  lesions) on an MRI administered within 60 days of blood draw.[26] In  
211 the first layer of the model, individual protein concentrations in  $\log_{10}$  which were  
212 demographically corrected for age and sex and LOQ-imputed (referred to as adjusted  
213 concentrations) were used as inputs into the four Disease Pathway models  
214 (Immunomodulation, Neuroinflammation, Myelin Biology, and Neuroaxonal Integrity).  
215 The second layer of the model used the adjusted protein concentrations and the  
216 output (eg, the probability) of the Disease Pathway models as meta features to  
217 calculate an overall Disease Activity score (**File S1, Supporting Information**).

218 Thresholds were established, which corresponded to low (1.0–4.0), moderate (4.5–  
219 7.0), and high (7.5–10.0) Disease Activity scores. Analytical characterization and  
220 validation of the individual biomarkers were factors used to determine inclusion of  
221 those biomarkers in the algorithm.

### 222 **2.3 Incurred sample reanalysis**

223 Incurred sample reanalysis was performed to characterize precision and robustness  
224 for the individual biomarkers and the Disease Activity and Disease Pathway scores.  
225 Forty-eight individual samples from patients with MS were repeatedly analyzed  
226 across 10 plates over  $\geq 5$  days with varied equipment, reagents, location, and  
227 personnel. Acceptability criteria for individual biomarkers was an average %CV  
228  $\leq 20\%$ , and average SD at all established Disease Activity score levels of  $\leq 1.0$  units.  
229 The 48 samples broadly represented the expected range of biomarker values and  
230 Disease Activity scores in the real-world MS population.

### 231 **2.4 Assay accuracy, precision, and sensitivity**

232 Accuracy for each analyte was determined by mixing serum samples at different  
233 ratios and evaluating the percent recovery of the observed concentration relative to  
234 the expected concentration. Sample mixing enabled the accuracy assessment to be  
235 performed using endogenous protein versus a recombinant protein source. Expected  
236 concentrations were calculated by applying the targeted ratios of unmixed samples.  
237 The ratios of sample mixtures with two samples were 25%:75%, 50%:50%, and  
238 75%:25%. The ratios of sample blends for mixtures with four samples were  
239 25%:25%:25%:25% and 40%:10%:40%:10%. Additionally, accuracy was also  
240 evaluated for the Disease Pathway and Disease Activity algorithms by correlating  
241 observed scores with expected scores using the same sample mixtures created for  
242 the individual analyte assessments.

243 Intra- and inter-assay precision was measured for each analyte. The %CV was  
244 determined using serum pools enabling the assessment to be performed using  
245 endogenous protein. Serum pools were manufactured to represent patients with  
246 shorter and longer MS disease duration, those with inflammatory disease  
247 (rheumatoid arthritis), and one healthy control. Acceptability criteria for intra- and  
248 inter-assay precision was established as %CV  $\leq 15\%$  and  $\leq 20\%$ , respectively.

249 Sensitivity was defined as the assay's ability to accurately and precisely detect  
250 low concentrations of a given substance in biological specimens. To establish the  
251 ULOQ and LLOQ, a LOQ panel was manufactured during assay development. For  
252 each analyte, four levels were targeted near the anticipated upper limit (ULOQ 1–4)  
253 and four levels were targeted near the anticipated lower limit (LLOQ 5–8). The  
254 targeted concentrations were based on expected real-world MS patient sample  
255 distributions, the shape of the standard curve, and location of asymptotes. The LOQ  
256 panel was run in triplicate over two lots ( $\geq 5$  runs per lot) and fit to the standard curve.  
257 Accuracy, defined as 80–120% recovery relative to the expected concentration and  
258 precision (inter-assay %CV  $\leq 20\%$ ), were used to establish the acceptability criteria  
259 and determine the LLOQ and ULOQ of each analyte. Additionally, individual LOQs  
260 were assessed and established separately for each kit lot. The most conservative  
261 LOQ levels with acceptable accuracy and precision parameters for both lots were  
262 used to establish the final LLOQ and ULOQ.

263 Undiluted serum samples were run in the MSDA Test and as a result, no  
264 dilution factor was accounted for in the sensitivity analysis. Therefore, the LLOQ and  
265 ULOQ define both the analytical measurement range and the reportable range of the  
266 assay. Serum samples that recovered either above the ULOQ or below the LLOQ  
267 were reported at the established LOQ concentration (referred to as LOQ imputation).  
268 MS serum samples were used to establish MS reference ranges for each biomarker.

269 A diverse set of patient samples were used throughout the assay development  
270 process and for the analytical validation studies. A total of 1645 samples from nine  
271 deeply phenotyped cohorts were analyzed primarily for evaluating associations of  
272 biomarkers with MS disease activity and disease progression endpoints. Additional  
273 samples from both patients with MS and other disease states were procured for  
274 specific analytical characterization experiments. The 1645 samples that were  
275 analyzed for the associations of biomarkers with MS endpoints were combined in the  
276 subsequent analysis to establish MS reference ranges. These samples were  
277 collected both retrospectively and prospectively from nine US and international sites  
278 and broadly represent the real-world MS population. The mean  $\pm$  SD age of these  
279 patients at the time of the blood draw was  $40.85 \pm 11.0$  years, with a mean  $\pm$  SD  
280 disease duration of  $8.39 \pm 8.0$  years; 72.8% of the patients were female. For race, the  
281 top 3 categories were White (81.4%), unknown/not reported (13.5%), and  
282 Black/African American (2.7%). The primary endpoint used to train the finalized  
283 MSDA Test algorithm was the presence and count of gadolinium-enhancing lesions  
284 on an MRI administered within close proximity to the blood draw. For the 1645 patient  
285 samples, 1326 had available gadolinium-positive (Gd+) lesion counts and 53.0% of  
286 the patient samples had  $\geq 1$  Gd+ lesion. The linear interpolation method was used to  
287 establish the 95% interval (2.5th and 97.5th percentiles).[27] The percentile relative  
288 to these reference ranges are presented with their protein concentrations.

## 289 **2.5 Assay interference**

290 Assay interference was defined as the effect of a substance present in the sample  
291 altering the correct value of the result or the recovery of samples in the assay. Since  
292 patients with MS may be treated with a variety of drugs, potential interference of  
293 drugs was tested to determine if their presence would affect measurement of the  
294 individual protein biomarkers. Concentrations of common prescriptions, over-the-

295 counter drugs, common MS drugs, and DMTs were spiked into serum samples  
296 **(Table S2)**. Concentrations of common prescription and over-the-counter drugs were  
297 determined by Sun Diagnostics (New Gloucester, ME, USA) using a commercially  
298 available test kit. DMTs were targeted at two times  $C_{max}$  from pharmacokinetic  
299 studies, or the highest possible concentration allowable for spiking with the procured  
300 interferent stock. Finally, a universal mAb standard was tested at two concentrations  
301 (424 and 7.93  $\mu\text{g/mL}$ ) to cover the two times  $C_{max}$  of several mAb DMTs.  
302 Endogenous substances (hemoglobin, bilirubin, and lipids) and heterophilic  
303 antibodies (RF and HAMA) were also measured. For most interferent substances, the  
304 acceptability threshold, or median recovery, for the interference assessment was  
305 established as 80–120% relative to a corresponding spike control, except for HAMA  
306 for which percent recovery of sample mixtures was evaluated (**File S2, Supporting**  
307 **Information**).

## 308 **2.6 Diurnal variability**

309 Patient serum samples were collected at days 1–5 and day 12 to characterize  
310 biomarker level fluctuations. For each of the six time points per patient, the %CV and  
311 the percentage difference of the observed protein concentration relative to the  
312 average concentration at all time points were calculated.

## 313 **2.7 Sample stability**

314 In an initial experiment, stability studies for four serum samples were performed to  
315 determine the effect that storage and processing conditions can have in a clinical  
316 setting. Stability was assessed at the following four temperatures:  $-65^{\circ}\text{C}$  or below  
317 ( $-80^{\circ}\text{C}$ ),  $-10^{\circ}\text{C}$  or below ( $-20^{\circ}\text{C}$ ),  $2-8^{\circ}\text{C}$  ( $4^{\circ}\text{C}$ ), and room temperature ( $18-25^{\circ}\text{C}$ ) at  
318 the following time points: 4 hours (for  $4^{\circ}\text{C}$  and room temperature) and days 1, 3, 7,  
319 14, and 28 (for  $-20^{\circ}\text{C}$ ,  $4^{\circ}\text{C}$ , and room temperature). The results from  $-20^{\circ}\text{C}$ ,  $4^{\circ}\text{C}$ ,

320 and room temperature were compared with the control storage condition ( $-80^{\circ}\text{C}$ ). In  
321 a follow-up study, the stability of storage of 14 samples was evaluated at  $4^{\circ}\text{C}$  at days  
322 1–3 and 7 compared with a control storage condition ( $-80^{\circ}\text{C}$ ) to establish the  
323 duration of time samples that can be stored at  $4^{\circ}\text{C}$ . Five freeze-thaw cycles,  
324 performed at  $-65^{\circ}\text{C}$  or below, were also evaluated using four MS serum samples  
325 compared with fresh samples.

326

## 327 **3 RESULTS AND DISCUSSION**

### 328 **3.1 Analytical characterization and validation**

329 Experiments were performed between July 2020 and July 2021. Fifty-one plates were  
330 run (40 and 11 plates using the first and second lots of manufactured kits,  
331 respectively).

332 Based on the analytical validation and characterization of individual  
333 biomarkers described below, the 18 out of 21 biomarkers that were included in the  
334 algorithm were determined to have acceptable analytical performance. GH and  
335 COL4A1 were excluded from the algorithm based on the analytical characterization  
336 studies described below. VCAN was not incorporated into the final algorithm due to  
337 biostatistical factors unrelated to analytical performance.

### 338 **3.2 Incurred sample reanalysis**

339 All individual biomarkers were determined to have a mean %CV  $<20\%$  and met  
340 established acceptability criteria (**Figure 1A**). The Disease Activity score and the four  
341 Disease Pathway scores demonstrated reproducible results throughout the range of  
342 scores (**Figures 1B–1F**). For the Disease Activity score, the average SD across 48  
343 samples was observed to be 0.3 score units, which is less than one interval (0.5) on  
344 the reportable scale, and as a result, met acceptability criteria. Additionally, incurred

345 sample reanalysis showed robustness and equivalency of the assay between lots  
346 and laboratories, with the exception of COL4A1 (**Table S3**).

### 347 **3.3 Assay accuracy, precision, and sensitivity**

348 Samples for the accuracy assessment were selected from an internal MS cohort  
349 ( $n=64$ ) to target both high and low concentrations for the individual biomarkers  
350 relative to the MS population. Twenty mixed samples from four selected samples  
351 were analyzed for each biomarker. Minimum percent recovery for each biomarker  
352 ranged from 78% to 89%; the maximum percent recovery for each biomarker ranged  
353 from 99% to 124%. The median percent recovery ranged from 91% to 100% (**Figure**  
354 **2A**). Additionally, the Disease Pathway and overall Disease Activity scores were  
355 calculated for both observed and expected concentrations of the various sample  
356 mixtures. The observed calculated scores correlated with the expected scores;  $R^2$   
357  $\geq 0.85$  was established as the acceptability criteria (**Figures 2B–2F**).

358 Twelve replicates per serum pool were analyzed on a single plate for the intra-  
359 assay precision assessment;  $\leq 51$  values per serum pool were analyzed across 51  
360 plates spanning 2 lots of reagent kits. The intra- and inter-assay precision satisfied  
361 the criteria for meeting the precision parameter with most analytes passing the  
362 established criteria. Of note, COL4A1 was found to have inferior inter- and intra-  
363 assay precision that ranged from 7% to 47% and 15% to 59%, respectively. Based  
364 on these findings, COL4A1 was removed from consideration for inclusion in the  
365 algorithm. MS serum samples ( $N=1645$ ) were analyzed during the assay  
366 development and validation process and used to establish the MS reference ranges  
367 for each analyte. Sensitivity analysis demonstrated that the LLOQ and ULOQ of each  
368 analyte met the sensitivity requirements established for the assay. The maximum  
369 percentage of samples requiring imputation at any LOQ was 1.8% (for NfL at LLOQ)  
370 (**Table 1**).

### 371 **3.3 Assay interference**

372 Most biomarker interactions with interferent combinations, such as common MS  
373 drugs, DMTs, and mAbs produced a median recovery that ranged from 80% to 120%  
374 (**Figure 3**). A lower percentage recovery was observed for two biomarkers, COL4A1  
375 and CCL20, demonstrating a potential alteration in the presence of the sample for  
376 individual drugs. COL4A1 produced a low percent recovery for several drugs that  
377 ranged from 71% to 79%, which was likely an artifact of established assay  
378 imprecision (**Figure 3** and **Figure S2**). For CCL20, cefoxitin spiked at 660 mg/dL  
379 resulted in a median percent recovery of 77% (**Figure S2**). Additional assay  
380 interferents are shown in **Figures S2** (common drugs) and **S3** (routine endogenous  
381 interferents and heterophilic antibodies).

### 382 **3.4 Diurnal variability**

383 Diurnal variation was evaluated in eight patients over six time points (**Figure S4**).  
384 Mean and median percent differences for each biomarker and patient were observed  
385 to be within  $\pm 20\%$ ; mean and median %CV was found to be  $<30\%$  for 19 of the 21  
386 biomarkers (**Table 2**). Of note, there were some individual samples that were outside  
387 of the acceptable range ( $\pm 30\%$ ; data not shown). In addition, mean and median  
388 diurnal variability  $\geq 30\%$  was observed for COL4A1, which may have been due to the  
389 imprecision of the assay to detect this biomarker. GH was also found to be more  
390 variable compared with the other biomarkers, which is not surprising, as GH has  
391 been previously reported to have a high degree of ultradian and diurnal variability.[28]  
392 For this reason, GH was removed from consideration for inclusion in the algorithm.

### 393 **3.5 Sample stability**

394 In the initial stability study, all biomarkers were stable for up to 1 day at room  
395 temperature and at 4°C, and for 28 days at  $-20^{\circ}\text{C}$ . For those samples stored at room



396 temperature, CXCL13, IL-12 $\beta$ , and TNFSF13B decreased beyond  $-20\%$  at 3 days.  
397 During a follow-up study, all biomarkers were found to meet acceptability criteria  
398 when stored at  $4^{\circ}\text{C}$ , and consistent with the initial study as well as the control  
399 condition ( $-80^{\circ}\text{C}$ ) at follow-up (**Table S4**). In a study to examine the stability of  
400 samples after freeze-thaw, most biomarkers met acceptability criteria when  
401 compared with fresh sample. Of note, GFAP concentrations decreased beyond  $-20\%$   
402 for freeze-thaw cycles 4 and 5 (**Table S5**). Finally, score level analysis showed that  
403 test conditions were within 3 SDs ( $\pm 1.5$  score difference) from the control conditions  
404 during the initial study (**Table S6**) and at follow-up (**Table S7**). From these findings,  
405 we showed that biomarker levels were found to be most affected above certain  
406 thresholds (room temperature for 24 hours,  $4^{\circ}\text{C}$  for 7 days,  $-20^{\circ}\text{C}$  for 28 days, and  
407 three freeze-thaws). These data can be used to establish allowable sample handling  
408 and storage conditions. Beyond these empirical estimations of protein stability, it is  
409 also important to note that statistically meaningful associations of biomarkers with  
410 multiple MS endpoints were observed using samples that had been stored at  $-80^{\circ}\text{C}$   
411 for extended periods of time. This suggests that the target epitopes for the proteins  
412 that were selected for inclusion in the custom assay panel and the final algorithm  
413 were sufficiently stable to derive clinically meaningful insights.

414

#### 415 **4 CONCLUSION**

416 The accuracy, precision, and reproducibility of a biomarker assay are critical to its  
417 utility as a diagnostic and prognostic tool in the management of complex  
418 neurodegenerative disorders such as MS. Additionally, such an assay should be  
419 insensitive to external factors such as assay interferents and sample collection,  
420 processing, and storage. The Clinical and Laboratory Standards Institute and the

421 United States Food and Drug Administration issued guidance on the development  
422 and validation of assays for the detection of serum-based biomarkers.[27,29,30]  
423 Parameters such as accuracy, precision, recovery, sensitivity and specificity, quality  
424 control, and sample stability need to be optimized for the assay to be properly  
425 validated.[27,29,30] Results from our analytical validation experiments to  
426 characterize the MSDA Test support that the assay is accurate, precise, sensitive,  
427 specific, and robust at determining individual biomarker levels and algorithmic scores,  
428 regardless of assay interferences, and validated in terms of sample stability. Our  
429 findings of high accuracy and precision for the MSDA Test assay align with those of  
430 other validation studies of multi-protein assays utilizing the same,[31,32] as well as  
431 alternative[21,22] platforms.

432 PEA demonstrated high sensitivity, specificity, reproducibility, and repeatability  
433 with low intra- and inter-assay variability, which has allowed for large-scale, high  
434 throughput screening of up to 92 proteins in 96 samples simultaneously, with low  
435 sample consumption and cost.[19] This platform detected novel protein biomarkers  
436 and biomarker combinations for many complex disease states, such as  
437 cardiovascular disease,[33-37] cancer,[32,38-40] Alzheimer's disease,[41] and  
438 inflammatory diseases such as atopic dermatitis and lupus[42,43]; the platform has  
439 also proven useful in aging research.[44] For the MSDA Test, we demonstrated that  
440 a focused panel of MS biomarkers can be developed and optimized on the PEA  
441 platform with absolute quantitation of the proteins to support a fit-for-purpose  
442 analytical validation, thereby enabling clinical use of the assay.

443 Thus far, there are no validated clinical tests that leverage multiple blood  
444 biomarkers to track disease activity or progression in patients with MS. This is critical  
445 for a disease such as MS, which has a complicated clinical course varying from mild,  
446 self-limiting to severe.[1] Although MS disease prognosis is primarily based on

447 clinical evidence, such as relapse rate and disability progression, and diagnostic tests  
448 (eg, brain MRI or the presence of oligoclonal immunoglobulin G bands in the  
449 CSF),[14] neither can consistently and accurately predict disease course, activity, or  
450 prognosis.[13] Given the emphasis on early diagnosis and the efficacy of therapies to  
451 treat early stages of the relapsing/remitting form of the disease,[4,5] validation of a  
452 biomarker panel remains an unmet need in clinical practice, and use of this  
453 biomarker tool should provide diagnostic and prognostic value for the treatment of  
454 MS. This study demonstrated identification of biomarkers for this complex disease  
455 using the PEA platform. With further clinical validation, this assay can potentially be  
456 used to track disease activity and progression of MS, allowing a more personalized  
457 approach to MS treatment.

458 A limitation of using a multi-protein assay is that the conditions established for  
459 one biomarker are not always uniform across the full panel of biomarkers. Our  
460 findings show that the MSDA Test was optimized for assessment of 18 out of the 21  
461 included biomarkers and the analytical validation paradigm that we described  
462 demonstrates a high level of accuracy, sensitivity, and precision with minimal cross-  
463 reactivity and interference by substances commonly seen in patients with MS.

464 This study serves as a critical first step in the validation of a multi-protein,  
465 serum-based assay. The next step in the validation of the MSDA Test is clinical  
466 validation, which will support and confirm the association between the serum-based  
467 MSDA Test and clinical and radiographic MS endpoints. Upon completion of clinical  
468 validation of the assay, the final Disease Activity and Disease Pathway algorithms will  
469 use the ensemble of validated proteins to expand the use of the assay by evaluating  
470 biomarker correlations with endpoints associated with additional MS disease  
471 assessments, selection of therapy, and differential diagnosis of patients with MS.  
472 Upon successful clinical validation, this MSDA Test will be a quantitative, minimally

473 invasive, and scalable tool to improve disease management for patients with MS and  
474 their physicians.

475 **ACKNOWLEDGMENTS**

476 The authors wish to thank the following team members from Olink Proteomics  
477 (Uppsala, Sweden) who were involved in the development of the Multiple Sclerosis  
478 Disease Activity Test assay: Erika Assarsson, Sandra Ohlsson, Martin Lundberg,  
479 Jessica Bergman, and Niklas Nordberg. All authors contributed to and approved the  
480 manuscript for submission. Writing and editorial assistance were provided by Jennifer  
481 L. Venzie, PhD, and Bu Reinen, PhD, CMPP, of The Lockwood Group (Stamford,  
482 CT, USA), and were funded by Octave Bioscience, Inc.

483

484 **CONFLICT OF INTEREST STATEMENT**

485 F. Qureshi, W. Hu, L. Loh, H. Patel and M. DeGuzman are employees of Octave  
486 Bioscience, Inc. M. Becich, F. Rubio da Costa, V. Gehman, and F. Zhang were  
487 employees of Octave Bioscience, Inc. at the time the study was completed. J. Foley  
488 has received research support from Biogen, Novartis, Adamas, Octave Bioscience,  
489 Inc., Genentech, and Mallinckrodt, received speakers' honoraria and acted as a  
490 consultant for EMD Serono, Genzyme, Novartis, Biogen, and Genentech, and has  
491 equity interest in Octave Bioscience Inc., and is the founder of InterPro Biosciences.  
492 T. Chitnis has received compensation for consulting from Biogen, Novartis  
493 Pharmaceuticals, Roche Genentech, and Sanofi Genzyme, and received research  
494 support from the National Institutes of Health, National MS Society, US Department  
495 of Defense, EMD Serono, I-Mab Biopharma, Mallinckrodt ARD, Novartis  
496 Pharmaceuticals, Octave Bioscience, Inc., Roche Genentech, and Tiziana Life  
497 Sciences.

498 **FUNDING**

499 The study was funded by Octave Bioscience, Inc. and in part by the U.S. Department  
500 of Defense (W81XWH2110633 to T Chitnis).

501

502 **DATA AVAILABILITY STATEMENT**

503 Access to data can be provided after a research proposal is submitted to the  
504 corresponding author and a data sharing agreement is in place.

505 **REFERENCES**

- 506
- 507 [1] Compston, A., Coles, A. (2008). Multiple sclerosis. *Lancet*, 372, 1502-1517.
- 508 [2] Weiner, H. L. (2004). Multiple sclerosis is an inflammatory T-cell-mediated
- 509 autoimmune disease. *Arch Neurol*, 61, 1613-1615.
- 510 [3] Miller, D. H., Chard, D. T., Ciccarelli, O. (2012). Clinically isolated syndromes.
- 511 *Lancet Neurol*, 11, 157-169.
- 512 [4] Giovannoni, G., Butzkueven, H., Dhib-jalbut, S., Hobart, J., Kobelt, G., Pepper,
- 513 G., . . . Vollmer, T. (2016). Brain health: time matters in multiple sclerosis. *Mult*
- 514 *Scler Relat Disord*, 9, S5-S48.
- 515 [5] Macaron, G., Ontaneda, D. (2019). Diagnosis and management of progressive
- 516 multiple sclerosis. *Biomedicines*, 7, 56.
- 517 [6] Miller, J. R. (2004). The importance of early diagnosis of multiple sclerosis. *J*
- 518 *Manag Care Pharm*, 10, S4-S11.
- 519 [7] Goldschmidt, T., Antel, J., König, F. B., Brück, W., Kuhlmann, T. (2009).
- 520 Remyelination capacity of the MS brain decreases with disease chronicity.
- 521 *Neurology*, 72, 1914-1921.
- 522 [8] Cunniffe, N., Coles, A. (2021). Promoting remyelination in multiple sclerosis. *J*
- 523 *Neurol*, 268, 30-44.
- 524 [9] McDonald, W. I., Compston, A., Edan, G., Goodkin, D., Hartung, H.-P., Lublin,
- 525 F. D., . . . Wolinsky, J. S. (2001). Recommended diagnostic criteria for multiple
- 526 sclerosis: guidelines from the international panel on the diagnosis of multiple
- 527 sclerosis. *Ann Neurol*, 50, 121-127.
- 528 [10] Thompson, A. J., Banwell, B. L., Barkhof, F., Carroll, W. M., Coetzee, T.,
- 529 Comi, G., . . . Cohen, J. A. (2018). Diagnosis of multiple sclerosis: 2017
- 530 revisions of the McDonald criteria. *Lancet Neurol*, 17, 162-173.
- 531 [11] Tintoré, M., Rovira, A., Río, J., Nos, C., Grivé, E., Téllez, N., . . . Montalban, X.
- 532 (2006). Baseline MRI predicts future attacks and disability in clinically isolated
- 533 syndromes. *Neurology*, 67, 968-972.
- 534 [12] Teixeira, M., Seabra, M., Carvalho, L., Sequeira, L., Abreu, P., Mendonça, T., .
- 535 . . Guimarães, J. (2020). Clinically isolated syndrome, oligoclonal bands and
- 536 multiple sclerosis. *Clin Exp Neuroimmunol*, 11, 33-39.
- 537 [13] Jafari, A., Babajani, A., Rezaei-Tavirani, M. (2021). Multiple sclerosis
- 538 biomarker discoveries by proteomics and metabolomics approaches. *Biomark*
- 539 *Insights*, 16, 11772719211013352.
- 540 [14] Ziemssen, T., Akgün, K., Brück, W. (2019). Molecular biomarkers in multiple
- 541 sclerosis. *J Neuroinflammation*, 16, 272.
- 542 [15] Gul, M., Jafari, A. A., Shah, M., Mirmoeeni, S., Haider, S. U., Moinuddin, S.,
- 543 Chaudhry, A. (2020). Molecular biomarkers in multiple sclerosis and its related
- 544 disorders: a critical review. *Int J Mol Sci*, 21, 6020.
- 545 [16] Hühmer, A. F., Biringer, R. G., Amato, H., Fonteh, A. N., Harrington, M. G.
- 546 (2006). Protein analysis in human cerebrospinal fluid: physiological aspects,
- 547 current progress and future challenges. *Dis Markers*, 22, 3-26.
- 548 [17] Zhang, J. (2007). Proteomics of human cerebrospinal fluid – the good, the
- 549 bad, and the ugly. *Proteomics Clin Appl*, 1, 805-819.
- 550 [18] Lublin, F. D., Reingold, S. C., Cohen, J. A., Cutter, G. R., Sørensen, P. S.,
- 551 Thompson, A. J., . . . Polman, C. H. (2014). Defining the clinical course of
- 552 multiple sclerosis: the 2013 revisions. *Neurology*, 83, 278-286.
- 553 [19] Assarsson, E., Lundberg, M., Holmquist, G., Björkesten, J., Bucht Thorsen, S.,
- 554 Ekman, D., . . . Fredriksson, S. (2014). Homogenous 96-plex PEA

- 555 immunoassay exhibiting high sensitivity, specificity, and excellent scalability.  
556 *PLoS One*, 9, e95192.
- 557 [20] Schubert, O. T., Röst, H. L., Collins, B. C., Rosenberger, G., Aebersold, R.  
558 (2017). Quantitative proteomics: challenges and opportunities in basic and  
559 applied research. *Nat Protoc*, 12, 1289-1294.
- 560 [21] Dillon, R., Croner, L. J., Bucci, J., Kairs, S. N., You, J., Beasley, S., . . . Wilcox,  
561 B. (2018). Analytical validation of a novel multiplex test for detection of  
562 advanced adenoma and colorectal cancer in symptomatic patients. *J Pharm*  
563 *Biomed Anal*, 154, 85-94.
- 564 [22] Eastman, P. S., Manning, W. C., Qureshi, F., Haney, D., Cavet, G., Alexander,  
565 C., Hesterberg, L. K. (2012). Characterization of a multiplex, 12-biomarker test  
566 for rheumatoid arthritis. *J Pharm Biomed Anal*, 70, 415-424.
- 567 [23] Chitnis, T., Prat, A. (2020). A roadmap to precision medicine for multiple  
568 sclerosis. *Multiple Sclerosis Journal*, 26, 522-532.
- 569 [24] Bhawal, R., Oberg, A. L., Zhang, S., Kohli, M. (2020). Challenges and  
570 opportunities in clinical applications of blood-based proteomics in cancer.  
571 *Cancers (Basel)*, 12, 2428.
- 572 [25] Chitnis, T., Becich, M., Bove, R., Cree, B. A. C., Gehman, V., Gomez, R., . . .  
573 Baranzini, S. E. Development of a custom multivariate proteomic serum based  
574 assay for association with radiographic and clinical endpoints in MS.  
575 Presented at: Americas Committee for Treatment and Research in Multiple  
576 Sclerosis and European Committee for Treatment and Research in Multiple  
577 Sclerosis; September 11-13, 2020; Virtual.
- 578 [26] Chitnis, T., Foley, J., Ionete, C., El Ayoubi, N., Saxena, S., Gaitan-Walsh, P., .  
579 . . . Khoury, S. J. Clinical validation study results of a multivariate proteomic  
580 serum based assay for disease activity assessments in multiple sclerosis.  
581 Presented at: 37th Congress of the European Committee for Treatment and  
582 Research in Multiple Sclerosis (ECTRIMS); October 13-15, 2021; Virtual.
- 583 [27] Clinical and Laboratory Standards Institute. (2018). EP283CE. Defining,  
584 establishing, and verifying reference intervals in the clinical laboratory. 3rd  
585 edition.
- 586 [28] Hancox, T. P. M., Skene, D. J., Dallmann, R., Dunn, W. B. (2021). Tick-tock  
587 consider the clock: the influence of circadian and external cycles on time of  
588 day variation in the human metabolome—a review. *Metabolites*, 11, 328.
- 589 [29] United States Food and Drug Administration. Bioanalytical method validation:  
590 guidance for industry. Accessed September 13, 2021.  
591 <https://www.fda.gov/media/70858/download>
- 592 [30] Clinical and Laboratory Standards Institute. (2016). EP07. Interference testing  
593 in clinical chemistry. 3rd edition.
- 594 [31] Xu, Y. W., Peng, Y. H., Chen, B., Wu, Z. Y., Wu, J. Y., Shen, J. H., . . . Xu, L.  
595 Y. (2014). Autoantibodies as potential biomarkers for the early detection of  
596 esophageal squamous cell carcinoma. *Am J Gastroenterol*, 109, 36-45.
- 597 [32] Yang, X., Suo, C., Zhang, T., Yin, X., Man, J., Yuan, Z., . . . Ye, W. (2021).  
598 Targeted proteomics-derived biomarker profile develops a multi-protein  
599 classifier in liquid biopsies for early detection of esophageal squamous cell  
600 carcinoma from a population-based case-control study. *Biomark Res*, 9, 12.
- 601 [33] Hijazi, Z., Wallentin, L., Lindbäck, J., Alexander, J. H., Connolly, S. J.,  
602 Eikelboom, J. W., . . . Siegbahn, A. (2020). Screening of multiple biomarkers  
603 associated with ischemic stroke in atrial fibrillation. *J Am Heart Assoc*, 9,  
604 e018984.



- 605 [34] Sanders-van Wijk, S., Tromp, J., Beussink-Nelson, L., Hage, C., Svedlund, S.,  
606 Saraste, A., . . . Shah, S. J. (2020). Proteomic evaluation of the comorbidity-  
607 inflammation paradigm in heart failure with preserved ejection fraction: results  
608 from the PROMIS-HFpEF study. *Circulation*, *142*, 2029-2044.
- 609 [35] Pol, T., Hijazi, Z., Lindbäck, J., Oldgren, J., Alexander, J. H., Connolly, S. J., . .  
610 . Wallentin, L. (2021). Using multimarker screening to identify biomarkers  
611 associated with cardiovascular death in patients with atrial fibrillation.  
612 *Cardiovasc Res*, cvab262.
- 613 [36] Feldreich, T., Nowak, C., Fall, T., Carlsson, A. C., Carrero, J. J., Ripsweden,  
614 J., . . . Ärnlöv, J. (2019). Circulating proteins as predictors of cardiovascular  
615 mortality in end-stage renal disease. *J Nephrol*, *32*, 111-119.
- 616 [37] Nowak, C., Carlsson, A. C., Östgren, C. J., Nyström, F. H., Alam, M.,  
617 Feldreich, T., . . . Ärnlöv, J. (2018). Multiplex proteomics for prediction of major  
618 cardiovascular events in type 2 diabetes. *Diabetologia*, *61*, 1748-1757.
- 619 [38] Leandersson, P., Åkesson, A., Hedenfalk, I., Malander, S., Borgfeldt, C.  
620 (2020). A multiplex biomarker assay improves the diagnostic performance of  
621 HE4 and CA125 in ovarian tumor patients. *PLoS One*, *15*, e0240418.
- 622 [39] Enroth, S., Berggrund, M., Lycke, M., Broberg, J., Lundberg, M., Assarsson,  
623 E., . . . Gyllensten, U. (2019). High throughput proteomics identifies a high-  
624 accuracy 11 plasma protein biomarker signature for ovarian cancer. *Commun*  
625 *Biol*, *2*, 221.
- 626 [40] Berggrund, M., Enroth, S., Lundberg, M., Assarsson, E., Stålberg, K.,  
627 Lindquist, D., . . . Gyllensten, U. (2019). Identification of candidate plasma  
628 protein biomarkers for cervical cancer using the multiplex proximity extension  
629 assay. *Mol Cell Proteomics*, *18*, 735-743.
- 630 [41] Whelan, C. D., Mattsson, N., Nagle, M. W., Vijayaraghavan, S., Hyde, C.,  
631 Janelidze, S., . . . Hansson, O. (2019). Multiplex proteomics identifies novel  
632 CSF and plasma biomarkers of early Alzheimer's disease. *Acta Neuropathol*  
633 *Commun*, *7*, 169.
- 634 [42] Petrackova, A., Smrzova, A., Gajdos, P., Schubertova, M., Schneiderova, P.,  
635 Kromer, P., . . . Kriegova, E. (2017). Serum protein pattern associated with  
636 organ damage and lupus nephritis in systemic lupus erythematosus revealed  
637 by PEA immunoassay. *Clin Proteomics*, *14*, 32.
- 638 [43] Brunner, P. M., He, H., Pavel, A. B., Czarnowicki, T., Lefferdink, R., Erickson,  
639 T., . . . Paller, A. S. (2019). The blood proteomic signature of early-onset  
640 pediatric atopic dermatitis shows systemic inflammation and is distinct from  
641 adult long-standing disease. *J Am Acad Dermatol*, *81*, 510-519.
- 642 [44] Moaddel, R., Ubaida-Mohien, C., Tanaka, T., Lyashkov, A., Basisty, N.,  
643 Schilling, B., . . . Ferrucci, L. (2021). Proteomics in aging research: a roadmap  
644 to clinical, translational research. *Aging Cell*, *20*, e13325.
- 645

646 **FIGURE LEGENDS**

647

648 **FIGURE 1.** Incurred sample reanalysis results for (A) Individual biomarkers and (B)

649 Overall Disease Activity score, (C) Immunomodulation, (D) Neuroinflammation, (E)

650 Myelin Biology, and (F) Neuroaxonal Integrity pathway scores in the MSDA Test.

651

652 **FIGURE 2.** Accuracy of the MSDA Test to detect (A) Individual biomarkers and (B)

653 Overall Disease Activity score, (C) Immunomodulation, (D) Neuroinflammation, (E)

654 Myelin Biology, and (F) Neuroaxonal Integrity pathway scores.

655

656 **FIGURE 3.** Assay interference for common MS drugs, DMTs, and the high

657 concentration of universal mAb surrogates in the MSDA Test.

**FIGURE 1**

**A. Individual biomarkers**

| Analyte   | Mean (% CV) |
|-----------|-------------|
| APLP1     | 13          |
| CCL20     | 13          |
| CD8       | 11          |
| CD30P1    | 12          |
| CNTN2     | 11          |
| CCL4A1    | 10          |
| CXCL13    | 10          |
| CXCL9     | 12          |
| FLRT2     | 10          |
| GFAP      | 19          |
| GR        | 12          |
| IL-12B    | 11          |
| MOG       | 9           |
| MY        | 14          |
| OPG       | 13          |
| OPN       | 11          |
| PRF1G     | 8           |
| SERPINA9  | 11          |
| TNFRSF10A | 12          |
| TNFRSF13B | 11          |
| VCAN      | 9           |

**B. Disease Activity Score**

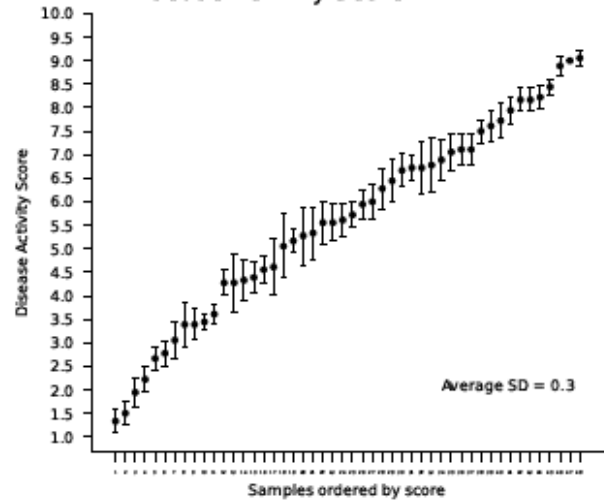

**C. Immunomodulation Score**

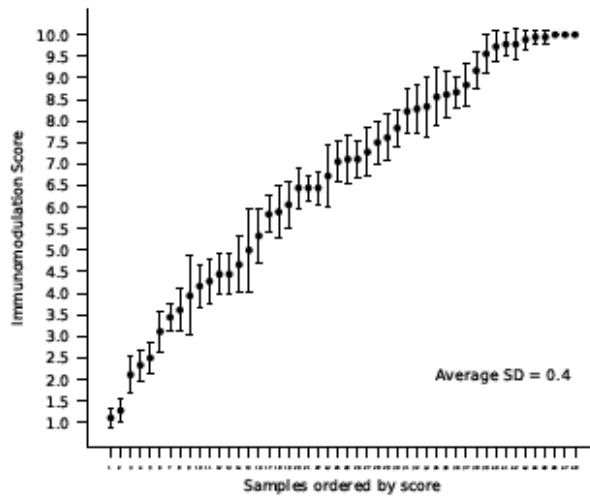

**D. Neuroinflammation Score**

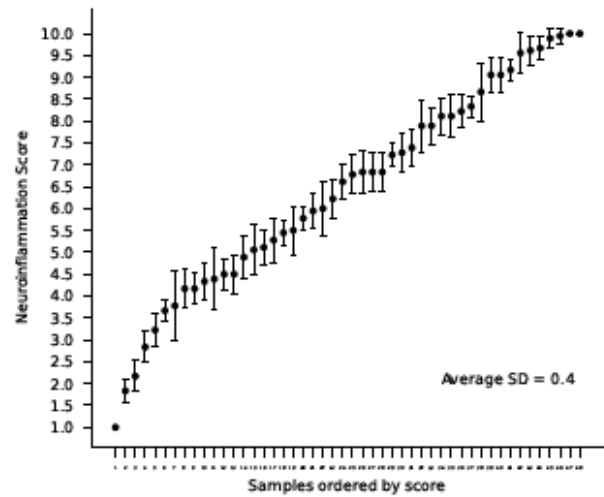

**E. Myelin Biology Score**

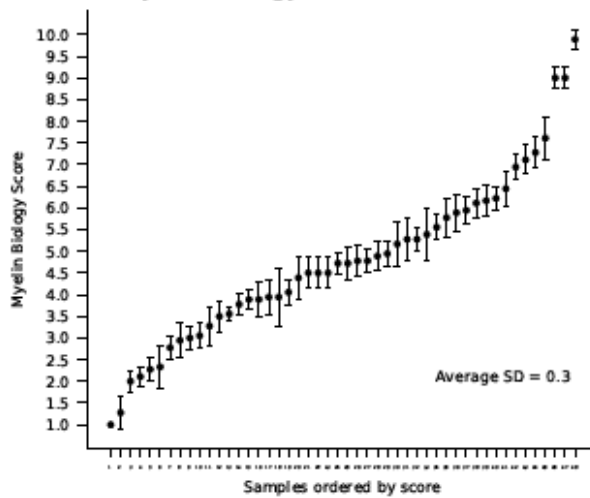

**F. Neuroaxonal Integrity Score**

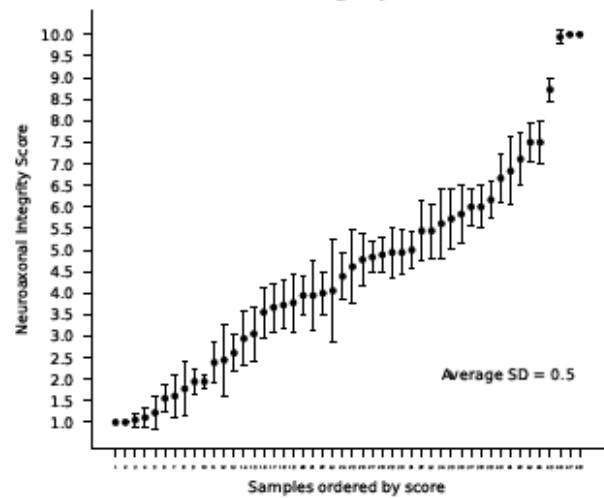

FIGURE 2

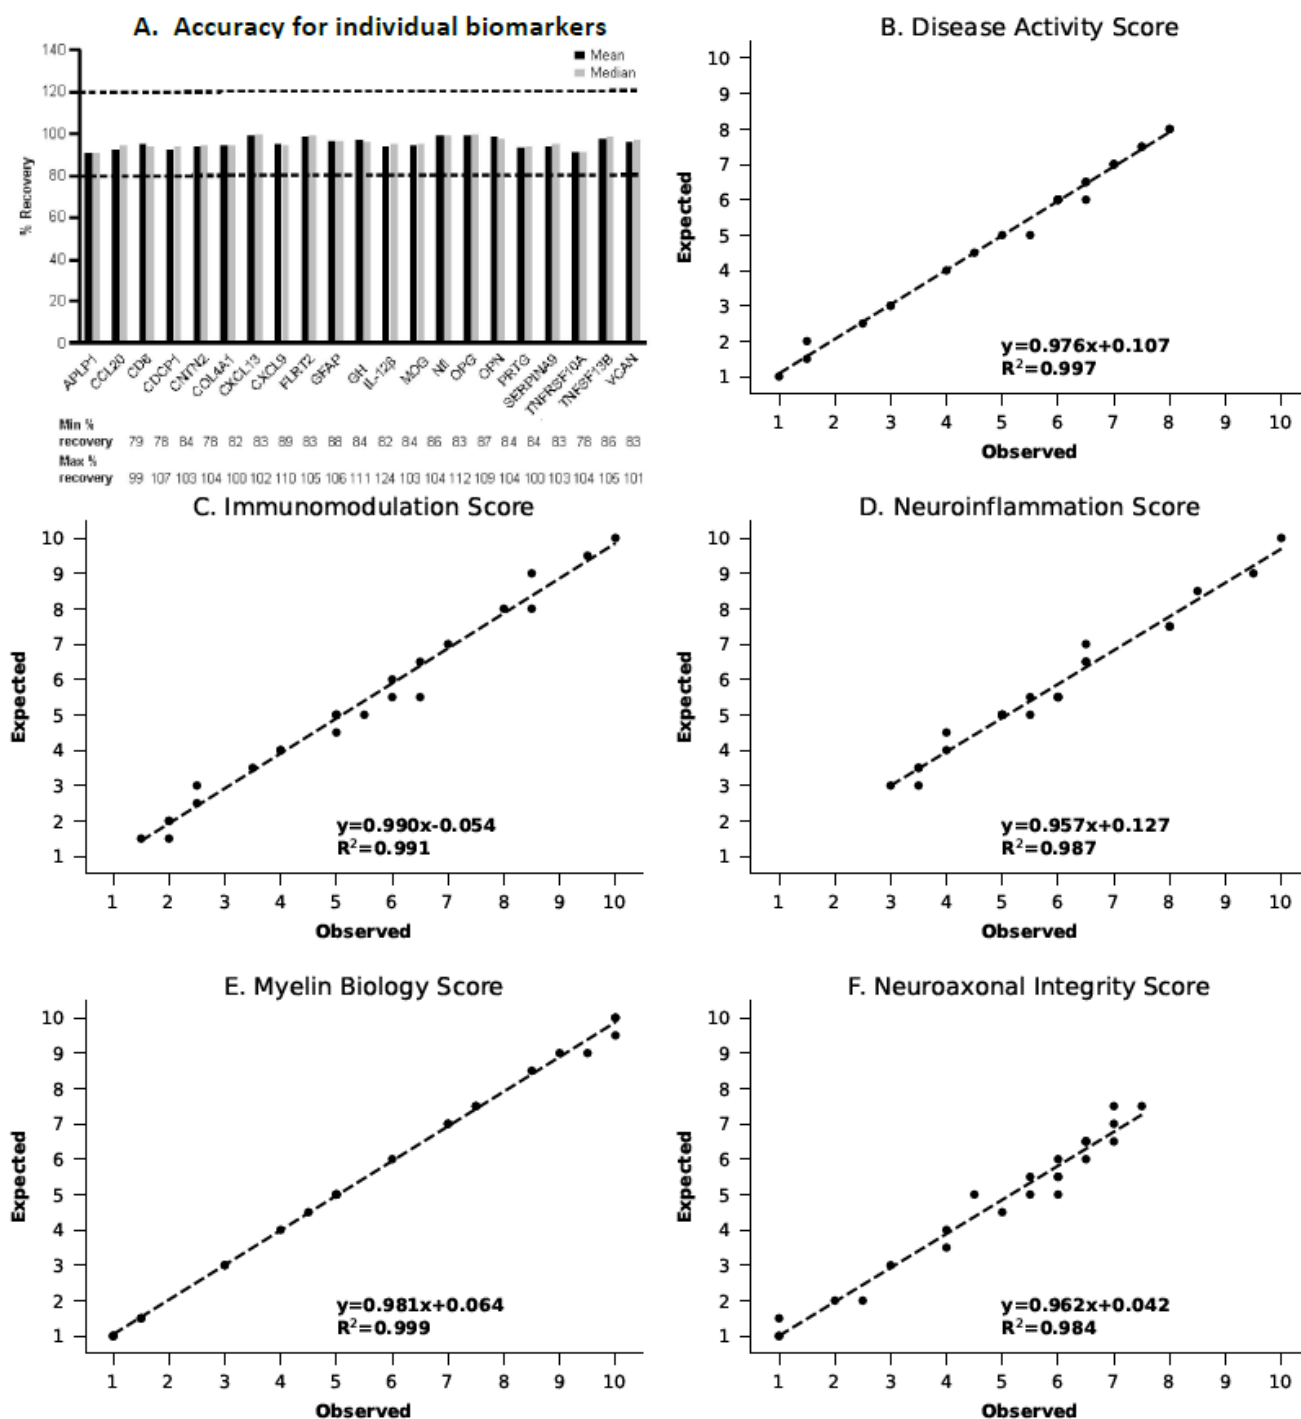

FIGURE 3

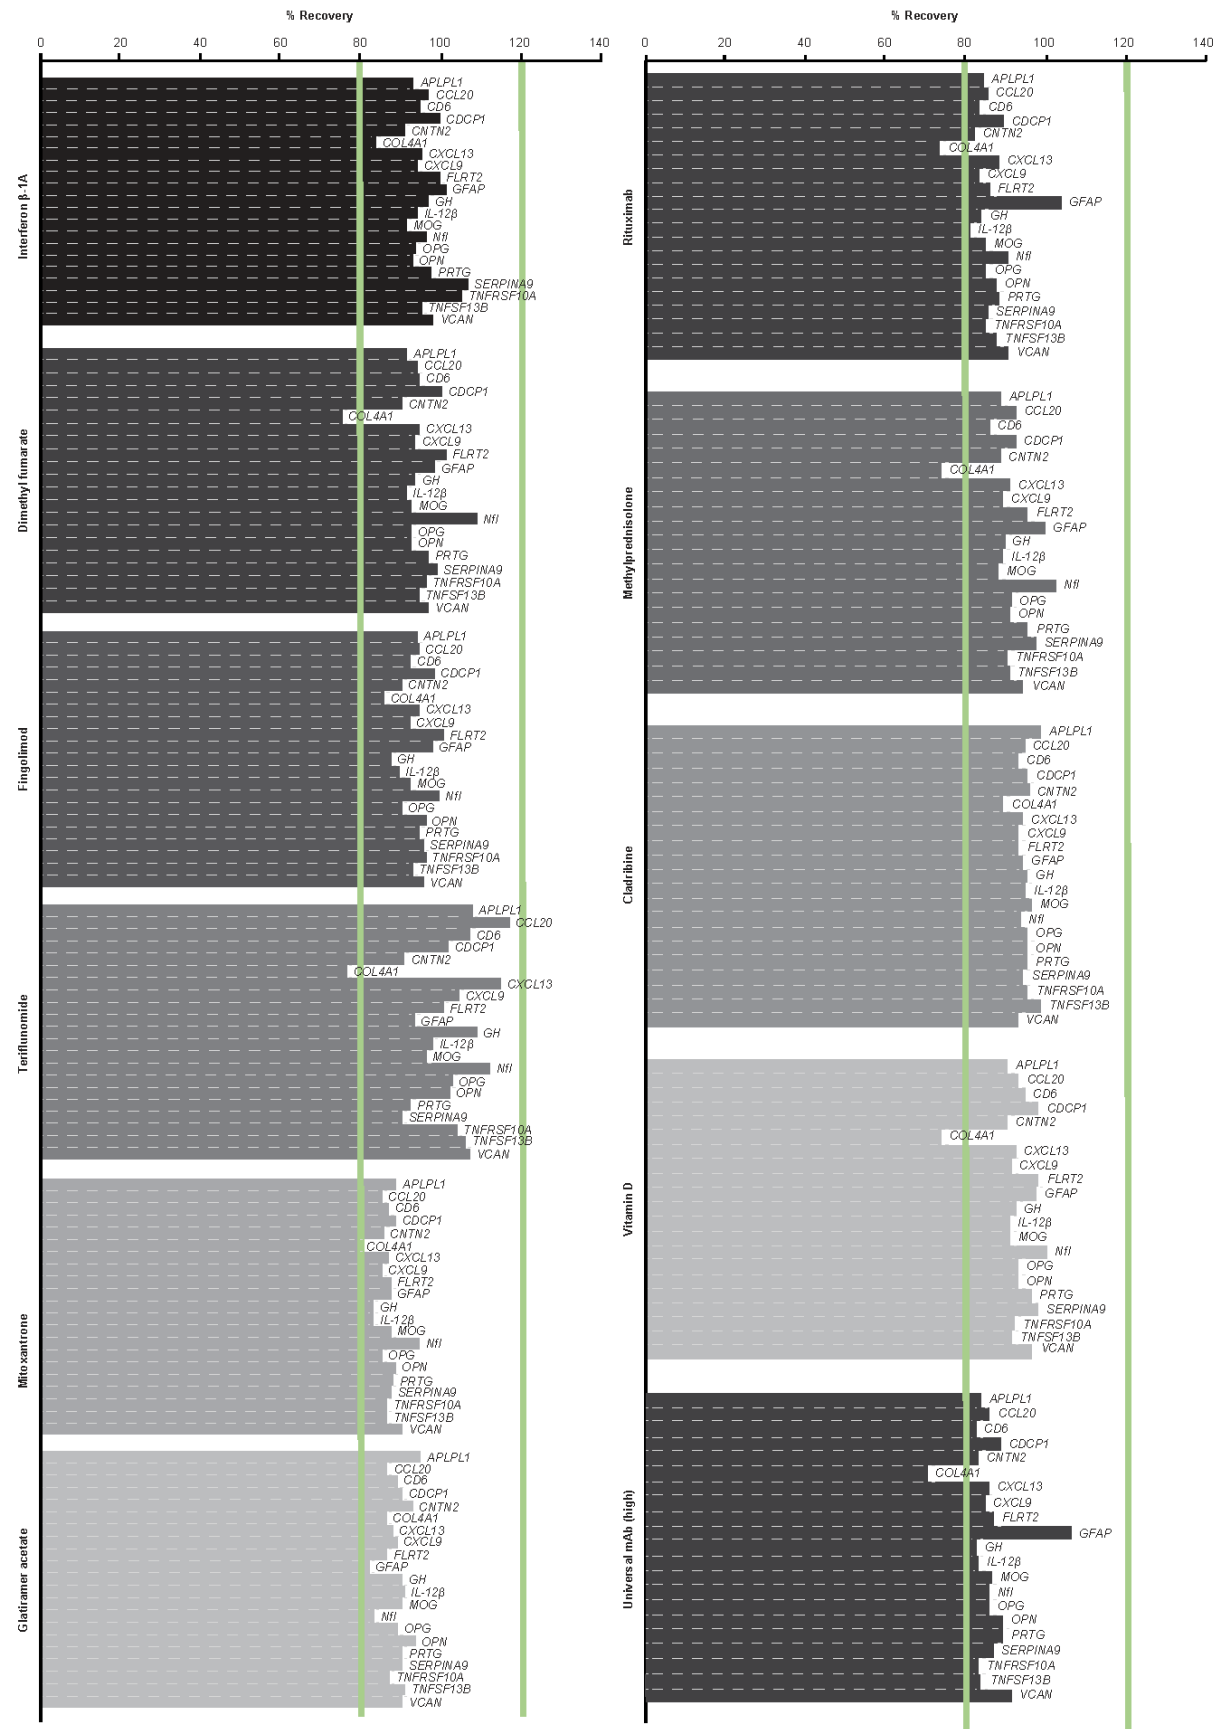

## TABLES

TABLE 1 Intra- and inter-assay precision, sensitivity, and reference ranges for biomarkers in the MSDA Test

| Analytes      | Precision                             |           |              |                                      |           |              |           |           |              |                      |           |              | Sensitivity and reference ranges |              |                                   |                                    |                                     |                                     |
|---------------|---------------------------------------|-----------|--------------|--------------------------------------|-----------|--------------|-----------|-----------|--------------|----------------------|-----------|--------------|----------------------------------|--------------|-----------------------------------|------------------------------------|-------------------------------------|-------------------------------------|
|               | Shorter MS duration pool <sup>a</sup> |           |              | Longer MS duration pool <sup>b</sup> |           |              | RA pool   |           |              | Healthy control pool |           |              | LLOQ (pg/mL)                     | ULOQ (pg/mL) | Low MS range (pg/mL) <sup>c</sup> | High MS range (pg/mL) <sup>d</sup> | Samples imputed at LLOQ, % (N=1645) | Samples imputed at ULOQ, % (N=1645) |
|               | Intra %CV                             | Inter %CV | Conc (pg/mL) | Intra %CV                            | Inter %CV | Conc (pg/mL) | Intra %CV | Inter %CV | Conc (pg/mL) | Intra %CV            | Inter %CV | Conc (pg/mL) |                                  |              |                                   |                                    |                                     |                                     |
| APLP1         | 9                                     | 9         | 10,296       | 9                                    | 8         | 11,560       | 4         | 8         | 11,868       | 7                    | 9         | 11,868       | 2323.78                          | 142,798.49   | 5500                              | 22,000                             | 0                                   | 0                                   |
| CCL20         | 6                                     | 9         | 6.9          | 8                                    | 7         | 9.2          | 5         | 9         | 13.7         | 7                    | 9         | 11.8         | 0.92                             | 383.49       | 2.1                               | 52                                 | 0                                   | 1 (<0.1)                            |
| CD6           | 6                                     | 8         | 89           | 8                                    | 8         | 108          | 5         | 7         | 137          | 8                    | 9         | 112          | 4.62                             | 3318.60      | 46                                | 250                                | 0                                   | 0                                   |
| CDCP1         | 8                                     | 9         | 78           | 8                                    | 9         | 125          | 4         | 9         | 208          | 7                    | 10        | 72           | 24.22                            | 6795.04      | 28                                | 230                                | 23 (1.4)                            | 1 (<0.1)                            |
| CNTN2         | 6                                     | 7         | 1120         | 7                                    | 7         | 1643         | 4         | 6         | 1554         | 8                    | 8         | 1256         | 44.46                            | 12,373.51    | 650                               | 3300                               | 0                                   | 0                                   |
| COL4A1        | 7                                     | 15        | 1104         | 19                                   | 20        | 1334         | 8         | 59        | 1601         | 47                   | 27        | 1387         | 30.65                            | 4573.38      | 520                               | 3600                               | 0                                   | 23 (1.4)                            |
| CXCL13        | 6                                     | 8         | 52.8         | 8                                    | 7         | 42.9         | 7         | 8         | 65.3         | 7                    | 9         | 46.8         | 1.91                             | 1112.70      | 22                                | 190                                | 0                                   | 0                                   |
| CXCL9         | 6                                     | 11        | 31.0         | 8                                    | 10        | 62.6         | 5         | 11        | 112.3        | 7                    | 11        | 27.5         | 1.89                             | 1832.22      | 17                                | 250                                | 0                                   | 0                                   |
| FLRT2         | 7                                     | 8         | 103          | 9                                    | 9         | 110          | 5         | 8         | 139          | 8                    | 9         | 116          | 35.67                            | 10,107.17    | 63                                | 180                                | 1 (<0.1)                            | 0                                   |
| GFAP          | 7                                     | 18        | 70           | 10                                   | 16        | 126          | 8         | 15        | 148          | 9                    | 18        | 77           | 12.46                            | 19,582.88    | 24                                | 220                                | 16 (1.0)                            | 0                                   |
| GH            | 7                                     | 9         | 823          | 8                                    | 7         | 595          | 5         | 8         | 1010         | 7                    | 9         | 366          | 9.63                             | 18,413.83    | 17                                | 9500                               | 7 (0.4)                             | 9 (0.5)                             |
| IL-12 $\beta$ | 7                                     | 9         | 109          | 9                                    | 7         | 122          | 6         | 8         | 118          | 8                    | 9         | 71           | 0.56                             | 3044.33      | 28                                | 280                                | 0                                   | 0                                   |
| MOG           | 4                                     | 6         | 21.9         | 7                                    | 6         | 22.8         | 5         | 7         | 26.0         | 6                    | 8         | 17.8         | 1.75                             | 577.42       | 12                                | 47                                 | 0                                   | 0                                   |
| NFL           | 10                                    | 11        | 7.6          | 13                                   | 9         | 15.6         | 8         | 8         | 20.6         | 11                   | 12        | 6.5          | 3.31                             | 599.18       | 3.5                               | 42                                 | 29 (1.8)                            | 0                                   |
| OPG           | 6                                     | 11        | 699          | 9                                    | 11        | 806          | 6         | 10        | 1022         | 7                    | 12        | 602          | 14.58                            | 62,385.21    | 410                               | 1400                               | 0                                   | 0                                   |
| OPN           | 6                                     | 10        | 15,733       | 7                                    | 10        | 15,415       | 6         | 12        | 17,470       | 7                    | 13        | 10,450       | 572.50                           | 157,267.29   | 9500                              | 39,000                             | 0                                   | 0                                   |
| PRTG          | 7                                     | 6         | 94           | 8                                    | 7         | 107          | 5         | 6         | 108          | 7                    | 7         | 103          | 3.90                             | 5920.73      | 71                                | 180                                | 2 (0.1)                             | 0                                   |
| SERPINA9      | 11                                    | 8         | 45.1         | 11                                   | 8         | 37.9         | 5         | 7         | 60.0         | 6                    | 14        | 50.0         | 5.12                             | 9286.67      | 12                                | 160                                | 1 (<0.1)                            | 0                                   |
| TNFRSF10A     | 9                                     | 9         | 5.1          | 9                                    | 9         | 5.5          | 5         | 8         | 7.6          | 9                    | 9         | 4.9          | 0.48                             | 1027.28      | 2.8                               | 9.7                                | 0                                   | 0                                   |
| TNFSF13B      | 7                                     | 10        | 4075         | 11                                   | 11        | 4019         | 5         | 11        | 4204         | 7                    | 13        | 3003         | 660.29                           | 130,682.08   | 2300                              | 10,000                             | 0                                   | 0                                   |
| VCAN          | 7                                     | 8         | 316          | 7                                    | 7         | 337          | 4         | 7         | 448          | 5                    | 8         | 310          | 8.54                             | 14,673.95    | 230                               | 600                                | 0                                   | 0                                   |

Green shading: intra- (%CV  $\leq 15\%$ ) or inter-assay (%CV  $< 20\%$ ) are within the acceptability range for the assays. Red shading: intra- (%CV  $> 15\%$ ) or inter-assay (%CV  $\geq 20\%$ ) precision values are outside the acceptability range for the assays.

<sup>a</sup>Average age of patients with shorter MS duration was 36 (range, 27–43) years.

<sup>b</sup>Average age of patients with longer MS duration was 52 (range, 45–62) years.

<sup>c</sup>Low MS range was defined as the 2.5th percentile.

<sup>d</sup>High MS range was defined as the 97.5th percentile.

**TABLE 2** Diurnal variability of eight samples in the MSDA Test across six time points (days 1, 2, 3, 4, 5, and 12)

| ANALYTE          | MEAN %CV | MEDIAN %CV |
|------------------|----------|------------|
| <i>APLP1</i>     | 14       | 15         |
| <i>CCL20</i>     | 25       | 21         |
| <i>CD6</i>       | 10       | 7          |
| <i>CDCP1</i>     | 12       | 12         |
| <i>CNTN2</i>     | 11       | 10         |
| <i>COL4A1</i>    | 44       | 39         |
| <i>CXCL13</i>    | 18       | 11         |
| <i>CXCL9</i>     | 13       | 11         |
| <i>FLRT2</i>     | 10       | 8          |
| <i>GFAP</i>      | 13       | 12         |
| <i>GH</i>        | 78       | 79         |
| <i>IL-12B</i>    | 10       | 9          |
| <i>MOG</i>       | 12       | 11         |
| <i>NFL</i>       | 17       | 17         |
| <i>OPG</i>       | 11       | 10         |
| <i>OPN</i>       | 10       | 8          |
| <i>PRTG</i>      | 8        | 6          |
| <i>SERPINA9</i>  | 12       | 12         |
| <i>TNFRSF10A</i> | 10       | 12         |
| <i>TNFSF13B</i>  | 11       | 8          |
| <i>VCAN</i>      | 10       | 7          |

Green shading: %CV ≤30%. Red shading: %CV >30%.



**Analytical Validation of a multi-protein, proteomic serum-based assay for  
disease activity assessments in multiple sclerosis**

Ferhan Qureshi,\* Wayne Hu,\* Louisa Loh, Hemali Patel, Maria DeGuzman,  
Michael Becich, Fatima Rubio da Costa, Victor Gehman, Fujun Zhang, John Foley,  
Tanuja Chitnis

\*These authors contributed equally to this work

**Supporting Information**

## **FILE S1. MSDA Test algorithm formula**

Key to the MSDA Test was the architecture of a stacked classifier (in the mlxtend [1] framework) where each node (blue boxes in the **Figure**) in both layers are L2-regularized logistic regression models from Scikit Learn.[2] The input layer read in demographically corrected for age and sex,  $\log_{10}$ , LOQ-imputed concentrations of proteins associated with four physiological pathways from each sample and generated probabilities that the sample in question was positive for the presence of Gd+lesions. The meta-classifier (output) layer of the model ingested the probabilities from each pathway model along with all of the protein concentrations that fed the first layer and generated an overall probability that the sample in question was Gd+lesion-positive. This probability was then mapped into a Disease Activity score by being shifted, scaled, rounded, and clipped to the nearest half point over a range from 1 to 10 (Eq. 1). A similar process converted the pathway probabilities into pathway scores after the pathway probabilities were adjusted so that for each sample, the mean over the adjusted pathway probabilities was equal to the Disease Activity probability for each sample (Eq. 2). The datasets used to develop and evaluate the demographic correction, four Disease Pathway models, and Disease Activity model, as well as the performance of these models, have been described previously.[2]

The process for calculating the Disease Activity score is shown in the **Figure**.

**FIGURE.** Schematic representation of the Disease Activity score calculation from protein concentrations (green) to both layers of the stacked classifier (blue), the output Disease Activity probability (red), and the final Disease Activity and Disease Pathway score (black).

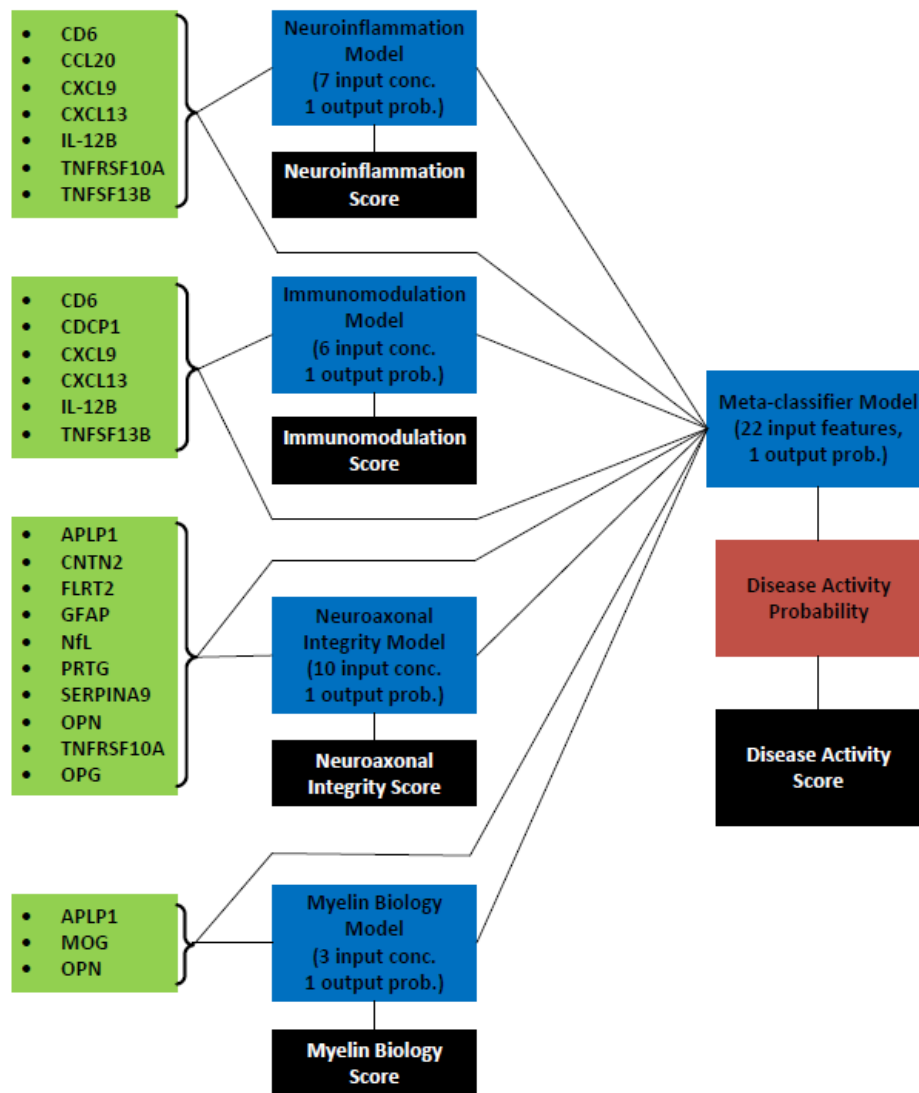

The overall Disease Activity score had the mathematical form:

$$S_{DA} = \text{Clip}_0^9 \left( \frac{1}{2} \text{Round} \left( 18 \times \frac{P_{DA} - P_{DA}^{Low}}{P_{DA}^{High} - P_{DA}^{Low}} \right) \right) + 1 \quad (1)$$

The “Clip” function limited the output of its argument to between 0 and 9. The “Round” function rounded to the nearest whole number.  $P_{DA}$  was the Disease Activity probability output from the final stage of the stacked classifier model.  $P_{DA}^{High}$  and

$P_{DA}^{Low}$  were probability clip values chosen for the overall Disease Activity (and each pathway) to maximize the range of the score over the entire training data set. Their values are tabulated below.

Similar to the Disease Activity score, each pathway score was computed from the pathway probabilities with the additional step of recentering the ensemble of pathway probabilities around the Disease Activity probability for each sample:

$$S_{pth} = \text{Clip}_0^9 \left( \frac{1}{2} \text{Round} \left( 18 \times \left( \frac{P_{pth} - P_{pth}^{Low}}{P_{pth}^{High} - P_{pth}^{Low}} + \frac{P_{DA} - P_{DA}^{Low}}{P_{DA}^{High} - P_{DA}^{Low}} - \frac{1}{N_{pth}} \sum_{pth'} \frac{P_{pth'} - P_{pth'}^{Low}}{P_{pth'}^{High} - P_{pth'}^{Low}} \right) \right) \right) + 1 \quad (2)$$

“Clip” and “Round” served the same purpose in Eq. 2 as in Eq.1.  $P_{pth}$  was the probability for pathway model  $pth$ .  $P_{DA}$  was again the probability output by the final stage of the stacked classifier. The “High” and “Low”  $P$ s for each  $pth$  served a similar purpose to those for the Disease Activity: rescaling the model probabilities so that they had a larger dynamic range. Lastly,  $N_{pth}$  was the number of pathway models that fed into the final layer of the stacked classifier model. In this case,  $N_{pth}=4$ .

The probabilities associated with each layer of the stacked classifier had a closed analytic form as well. Working backward from the final Disease Activity score, the Disease Activity probability had the form:

$$P_{DA} = \frac{1}{1 + e^{-(C_{DA}^0 + \sum_{feat} C_{feat} V_{feat})}} \quad (3)$$

$C_{DA}^0$  was the intercept (or bias) value for the Disease Activity meta-classifier.  $C_{feat}$  was the coefficient associated with  $V_{feat}$ .  $V_{feat}$  was the value of the feature being summed, either the probability for one of the pathways from the first layer of the model (written out explicitly in Eq. 4) or the age- and sex- corrected,  $\log_{10}$ , LOQ-imputed concentrations that fed into the first-layer pathway models. These meta-

classifier coefficients were fit using L2-penalized logistic regression with Gd+ lesion presence as the dependent variable, an intercept, and the stacked classifier features as the independent variables, with inverse regularization strength  $C=1.0$ , balanced class weight, and tolerance  $=0.0001$ , with the 'lbfgs' solver.

The individual pathway probabilities had the form:

$$P_{pth} = \frac{1}{1 + e^{-(C_{pth}^0 + \sum_{prot} C_{prot} V_{prot})}} \quad (4)$$

$C_{pth}^0$  was the intercept value for the pathway model in question.  $C_{prot}$  was the coefficient for a protein in pathway  $pth$ .  $V_{prot}$  was the demographically corrected,  $\log_{10}$ , LOQ-imputed concentration of protein  $prot$ . These coefficients were fit using L2-penalized logistic regression with Gd+ lesion presence as the dependent variable, an intercept, and the pathway's demographically corrected (for age, sex),  $\log_{10}$ , LOQ-imputed protein concentrations as the independent variables. The final pathway coefficients were the result of a stratified, 10-fold cross-validation with 3 repeats, grid-searched over inverse regularization strength  $C=[100, 10, 1.0, 0.1, 0.01]$ , class weights=[None, balanced], solvers=["saga," "lbfgs," "liblinear"], and tolerances=[0.01, 0.001, 0.0001]. The demographic correction for the  $\log_{10}$  of the LOQ-imputed protein concentration had the form:

$$V_{prot} = \log_{10} \left( A_{prot} \left[ \frac{pg}{mL} \right] \right) - [D_{prot,0} + (D_{prot,Sex} \times Sex) + (D_{prot,Age} \times Age[years])] \quad (5)$$

$A_{prot}$  was the LOQ-imputed absolute concentration of protein  $prot$  in pg/mL (the units of these direct measurements have been written explicitly for added clarity).

$D_{prot,0}$ ,  $D_{prot,Sex}$ , and  $D_{prot,Age}$  were the intercept, sex, and age coefficients for demographic correction, respectively. These coefficients were fit using the following procedure on three datasets not reported here. The dataset used to train the stacked classifier and pathway models provided the final non-zero coefficients for the

demographic correction. The demographic correction coefficients were fit independently on each dataset using linear regression using StatsModels OLS[4] with  $\log_{10}$ , LOQ-imputed protein concentration as the dependent variable, an intercept, and age and sex as the independent variables, after outliers were removed. Outliers were defined for each dataset as  $\geq 96$ th percentile or  $\leq 4$ th percentile for  $\log_{10}$ , LOQ-imputed protein concentration. After fitting the linear regression, the age and sex coefficients were set to zero if the 95% confidence interval contained zero in any of the three datasets or if the sign of the coefficient was not consistent across three datasets. Sex was 0 for women and 1 for men, and age was the patient's age in years at time of blood draw. Finally, see below for tables of the coefficients used in each step of the scoring process. First, we tabulated the demographic correction coefficients. These were the  $D_s$  in Eq. 5.

| <b>Protein</b> | <b>Sex</b> | <b>Age</b> | <b>Intercept</b> |
|----------------|------------|------------|------------------|
| APLP1          | -0.052     | 0          | 4.065            |
| CCL20          | 0          | 0          | 1.088            |
| CD6            | 0          | 0          | 1.959            |
| CDCP1          | 0          | 0.006      | 1.64             |
| CNTN2          | 0          | 0.002      | 3.128            |
| CXCL13         | 0          | 0          | 1.819            |
| CXCL9          | 0          | 0.005      | 1.419            |
| FLRT2          | 0          | 0          | 1.968            |
| GFAP           | -0.05      | 0.005      | 1.692            |
| IL-12B         | 0          | 0          | 2.062            |
| MOG            | -0.04      | 0.003      | 1.267            |
| NfL            | 0          | 0.008      | 0.5              |
| OPG            | -0.014     | 0.002      | 2.743            |

|           |       |       |       |
|-----------|-------|-------|-------|
| OPN       | 0.045 | 0     | 4.172 |
| PRTG      | 0     | 0     | 2.052 |
| SERPINA9  | 0     | 0     | 1.56  |
| TNFRSF10A | 0     | 0.003 | 0.565 |
| TNFSF13B  | 0     | 0     | 3.75  |

Next, we tabulated the protein coefficients for each pathway. These were the Cs in Eq. 4.

- Neuroinflammation:

| <b>Feature</b> | <b>Coefficient</b> |
|----------------|--------------------|
| CCL20          | 0.397              |
| CD6            | 0.243              |
| CXCL13         | 0.668              |
| CXCL9          | 0.778              |
| IL-12B         | -1.515             |
| TNFRSF10A      | 0.089              |
| TNFSF13B       | -2.705             |
| Intercept      | -0.283             |

- Immunomodulation:

| <b>Feature</b> | <b>Coefficient</b> |
|----------------|--------------------|
| CD6            | 0.825              |
| CDCP1          | -0.633             |
| CXCL13         | 1.075              |
| CXCL9          | 1.178              |
| IL-12B         | -1.657             |
| TNFSF13B       | -4.232             |
| Intercept      | -0.483             |

- Neuroaxonal Integrity:

| <b>Feature</b> | <b>Coefficient</b> |
|----------------|--------------------|
| APLP1          | -0.149             |
| CNTN2          | -0.434             |
| FLRT2          | -0.321             |
| GFAP           | 0.024              |
| NfL            | 2.998              |
| OPG            | 0.384              |
| OPN            | 0.026              |
| PRTG           | -0.621             |
| SERPINA9       | -0.779             |
| TNFRSF10A      | -0.284             |
| Intercept      | -0.744             |

- Myelin Biology:

| <b>Feature</b> | <b>Coefficient</b> |
|----------------|--------------------|
| APLP1          | -1.206             |
| MOG            | 2.653              |
| OPN            | -0.037             |
| Intercept      | -0.552             |

Then we tabulated the meta-classifier coefficients for the second stage of the stacked classifier. These were the  $C_s$  in Eq. 3.

| <b>Feature</b> | <b>Coefficient</b> |
|----------------|--------------------|
| APLP1          | -0.363             |
| CCL20          | 0.222              |
| CD6            | 0.119              |
| CDCP1          | -0.524             |
| CNTN2          | -0.21              |
| CXCL13         | 0.1                |
| CXCL9          | 0.252              |
| FLRT2          | -0.111             |



|                                          |        |
|------------------------------------------|--------|
| GFAP                                     | 0.042  |
| IL-12B                                   | -0.432 |
| MOG                                      | 0.485  |
| NfL                                      | 2.038  |
| OPG                                      | 0.056  |
| OPN                                      | -0.072 |
| PRTG                                     | 0.768  |
| SERPINA9                                 | 0.142  |
| TNFRSF10A                                | -0.178 |
| TNFSF13B                                 | -1.3   |
| Neuroinflammation pathway classifier     | 1.14   |
| Immunomodulation pathway classifier      | 1.737  |
| Neuroaxonal integrity pathway classifier | 1.525  |
| Myelin biology pathway classifier        | 0.435  |
| Intercept                                | -2.51  |

Finally, we tabulated the low and high values for scaling the probabilities in Eq.1 and Eq.2.

| <b>Disease Pathway/Disease Activity score</b> | $P_{Low\ pth}$ | $P_{High\ pth}$ |
|-----------------------------------------------|----------------|-----------------|
| <b>Disease Pathway</b>                        |                |                 |
| Immunomodulation                              | 0.05           | 1.0             |
| Myelin Biology                                | 0.2            | 0.6             |
| Neuroaxonal Integrity                         | 0.1            | 1.0             |
| Neuroinflammation                             | 0.15           | 0.95            |
| <b>Disease Activity</b>                       | 0.05           | 1.00            |

Abbreviations:  $P_{High\ pth}$ , high values for scaling probabilities;  $P_{Low\ pth}$ , low values for scaling probabilities.

## **FILE S2. Assay interferents**

Samples were analyzed for potential interference with endogenous substances found naturally in patients' samples (eg, lipemia, hemolysis, high protein count, and high bilirubin levels) and heterophilic antibodies such as HAMA and RF. Serum pools ( $n=4$ ) were spiked with bilirubin, hemolysate, and lipids at typical concentrations using the ASSURANCE™ Interference Test Kit (Sun Diagnostics).

Heterophilic antibodies, including RF and HAMA, are established sources of potential interference in immunoassays. RF concentrate (Lee BioSolutions, Maryland Heights, MO, USA) was used to spike six serum samples at low (150 IU/mL) and high (2000 IU/mL) concentrations to determine the effect of RF interference on the analysis. For HAMA interference, five HAMA-positive serum samples with known established HAMA levels (ASSURANCE™ Interference Test Kit) were mixed at different ratios (10:90; 50:50; 90:10) with four MS samples from an internal cohort. Two HAMA-positive samples had a titer level  $>240$  and three samples had a titer level  $>480$ , indicating that the positive samples had either  $>240$  or  $>480$  times more activity than a known negative. The mixed samples were compared with expected ratios of the individually measured samples to calculate the percent recovery.

Except for heterophilic antibody interference, the mean percentage recovery was calculated relative to the corresponding spike control (representing the same alteration of the serum sample without the addition of the interferent). For heterophilic antibody interference, the mean percentage recovery was calculated by comparing the RF spiked (low and high concentrations) samples with a corresponding spike control.

**TABLE S1** Protein biomarkers included in assay panel to perform the MSDA Test

| <b>Biomarker</b>               | <b>Full name</b>                                                 | <b>UniProt identifier</b> |
|--------------------------------|------------------------------------------------------------------|---------------------------|
| <i>APLP1</i>                   | Amyloid beta precursor-like protein 1                            | P51693                    |
| <i>CCL20</i>                   | C-C motif chemokine ligand 20 (MIP 3-alpha)                      | P78556                    |
| <i>CD6</i>                     | Cluster of differentiation 6                                     | P30203                    |
| <i>CDCP1</i>                   | CUB domain-containing protein 1                                  | Q9H5V8                    |
| <i>CNTN2</i>                   | Contactin 2                                                      | Q02246                    |
| <i>CXCL13</i>                  | Chemokine (C-X-C motif) ligand 13                                | P02462                    |
| <i>CXCL9</i>                   | Chemokine (C-X-C motif) ligand 9 (MIG)                           | O43927                    |
| <i>COL4A1<sup>a</sup></i>      | Collagen type IV alpha 1                                         | Q07325                    |
| <i>FLRT2</i>                   | Fibronectin leucine-rich repeat transmembrane protein            | O43155                    |
| <i>GFAP</i>                    | Glial fibrillary acidic protein                                  | P14136                    |
| <i>GH<sup>a</sup></i>          | Growth hormone (somatotropin)                                    | P01241                    |
| <i>IL-12<math>\beta</math></i> | Interleukin-12 subunit beta                                      | P29460                    |
| <i>MOG</i>                     | Myelin oligodendrocyte glycoprotein                              | Q16653                    |
| <i>NfL</i>                     | Neurofilament light polypeptide chain                            | P07196                    |
| <i>OPG</i>                     | Osteoprotegerin                                                  | O00300                    |
| <i>OPN</i>                     | Osteopontin                                                      | P10451                    |
| <i>PRTG</i>                    | Protogenin                                                       | Q2VWP7                    |
| <i>SERPINA9</i>                | Serpin family A member 9                                         | Q86WD7                    |
| <i>TNFRSF10A</i>               | Tumor necrosis factor receptor superfamily member 10A (TRAIL-R1) | O00220                    |
| <i>TNFSF13B</i>                | Tumor necrosis factor superfamily member 13B (BAFF)              | Q9Y275                    |
| <i>VCAN<sup>a</sup></i>        | Versican core protein                                            | P13611                    |

<sup>a</sup>These biomarkers were not used in the algorithm to determine Disease Pathway and Disease Activity scores.

**TABLE S2** Common over-the-counter and prescription drugs, reference materials and standards, and mAbs evaluated for interference in the MSDA Test

| <b>Assay interferents</b>                                 | <b>Concentration</b> |
|-----------------------------------------------------------|----------------------|
| <b>Common drugs</b>                                       |                      |
| Acetaminophen                                             | 15.6 mg/dL           |
| Ampicillin Na                                             | 7.5 mg/dL            |
| Acetylsalicylic acid                                      | 3 mg/dL              |
| Doxycycline HCl                                           | 1.8 mg/dL            |
| Cefoxitin Na                                              | 660 mg/dL            |
| Heparin                                                   | 3300 U/L             |
| Cyclosporine                                              | 0.18 mg/dL           |
| Levodopa                                                  | 0.75 mg/dL           |
| Ibuprofen                                                 | 21.9 mg/dL           |
| Methyldopa                                                | 2.25 mg/dL           |
| Phenylbutazone                                            | 32.1 mg/dL           |
| Metronidazole                                             | 12.3 mg/dL           |
| Rifampicin                                                | 4.8 mg/dL            |
| Theophylline                                              | 6 mg/dL              |
| Acetylcysteine                                            | 15 mg/dL             |
| <b>Reference materials and standards to evaluate DMTs</b> |                      |
| Interferon $\beta$ -1A (Avonex, Rebif)                    | 0.56 ng/mL           |
| Dimethyl fumarate (Tecfidera)                             | 3.74 $\mu$ g/mL      |
| Fingolimod (Gilenya)                                      | 8.8 ng/mL            |
| Teriflunomide (Aubagio)                                   | 90.6 $\mu$ g/mL      |
| Mitoxantrone (Novantrone)                                 | 0.674 $\mu$ g/mL     |
| Rituximab (Rituxan)                                       | 370 $\mu$ g/mL       |
| Methylprednisolone                                        | 0.141 $\mu$ g/mL     |
| Cladribine (Mavenclad)                                    | 0.058 $\mu$ g/mL     |
| Glatiramer acetate (Copaxone, Glatopa)                    | 1.0 $\mu$ g/mL       |
| Vitamin D2 (Ergocalciferol)                               | 0.2 $\mu$ g/mL       |

**Universal mAb surrogates<sup>a</sup>**

High concentration

424 µg/mL

Low concentration

7.93 µg/mL

---

<sup>a</sup>Surrogates for natalizumab, ocrelizumab, alemtuzumab, and ofatumumab.

**TABLE S3** Lot to lot (batch 1 vs. batch 2) and laboratory to laboratory (development vs. clinical laboratory) consistency of the MSDA Test

|                                | Mean % difference   |                                     | R <sup>2</sup> correlation of samples |                                     |
|--------------------------------|---------------------|-------------------------------------|---------------------------------------|-------------------------------------|
|                                | Batch 1 vs. batch 2 | Development vs. clinical laboratory | Batch 1 vs. batch 2                   | Development vs. clinical laboratory |
| <i>APLP1</i>                   | 0                   | -1                                  | 0.93                                  | 0.95                                |
| <i>CCL20</i>                   | -14                 | -12                                 | 0.99                                  | 1.00                                |
| <i>CD6</i>                     | -9                  | -9                                  | 0.97                                  | 0.97                                |
| <i>CDCP1</i>                   | -9                  | -10                                 | 0.99                                  | 1.00                                |
| <i>CNTN2</i>                   | 8                   | 4                                   | 0.96                                  | 0.97                                |
| <i>COL4A1</i>                  | -27                 | -17                                 | 0.97                                  | 0.98                                |
| <i>CXCL13</i>                  | -7                  | -5                                  | 0.99                                  | 1.00                                |
| <i>CXCL9</i>                   | -16                 | -11                                 | 1.00                                  | 1.00                                |
| <i>FLRT2</i>                   | -3                  | -6                                  | 0.95                                  | 0.98                                |
| <i>GFAP</i>                    | -13                 | -9                                  | 0.96                                  | 0.97                                |
| <i>GH</i>                      | -3                  | -6                                  | 0.98                                  | 0.99                                |
| <i>IL-12<math>\beta</math></i> | -5                  | -5                                  | 0.97                                  | 0.98                                |
| <i>MOG</i>                     | 2                   | 0                                   | 0.98                                  | 0.98                                |
| <i>NfL</i>                     | -13                 | -10                                 | 0.98                                  | 0.99                                |
| <i>OPG</i>                     | -17                 | -9                                  | 0.97                                  | 0.98                                |
| <i>OPN</i>                     | -14                 | -7                                  | 0.97                                  | 0.99                                |
| <i>PRTG</i>                    | 0                   | -5                                  | 0.97                                  | 0.98                                |
| <i>SERPINA9</i>                | -4                  | -5                                  | 0.99                                  | 0.99                                |
| <i>TNFRSF10A</i>               | -7                  | -11                                 | 0.98                                  | 0.99                                |
| <i>TNFSF13B</i>                | -6                  | -5                                  | 0.96                                  | 0.98                                |
| <i>VCAN</i>                    | -8                  | -9                                  | 0.91                                  | 0.95                                |

**TABLE S4** Storage, processing, and stability of the individual biomarkers at various temperatures (room temperature, 4°C, and -20°C) over time during the initial and follow-up studies

| Mean % difference vs. experimental control conditions |                  |       |       |       |        |        |     |       |       |       |        |        |       |       |       |        |        |                 |       |       |       |  |
|-------------------------------------------------------|------------------|-------|-------|-------|--------|--------|-----|-------|-------|-------|--------|--------|-------|-------|-------|--------|--------|-----------------|-------|-------|-------|--|
| Initial study                                         |                  |       |       |       |        |        |     |       |       |       |        |        |       |       |       |        |        | Follow-up study |       |       |       |  |
| Analyte                                               | Room temperature |       |       |       |        |        | 4°C |       |       |       |        |        | -20°C |       |       |        |        |                 | 4°C   |       |       |  |
|                                                       | 4 h              | Day 1 | Day 3 | Day 7 | Day 14 | Day 28 | 4 h | Day 1 | Day 3 | Day 7 | Day 14 | Day 28 | Day 1 | Day 3 | Day 7 | Day 14 | Day 28 | Day 1           | Day 2 | Day 3 | Day 7 |  |
| APLP1                                                 | 4                | 17    | 7     | 19    | 48     | 134    | -6  | -8    | 12    | 31    | 12     | 25     | 5     | 9     | 0     | 5      | 10     | 10              | 5     | 7     | 11    |  |
| CCL20                                                 | 4                | 2     | -6    | -7    | 8      | 47     | 1   | -3    | 11    | 24    | 15     | 23     | 12    | 13    | 6     | 5      | 7      | -1              | -2    | 4     | 12    |  |
| CD6                                                   | -2               | -4    | -14   | -5    | 19     | 93     | -10 | -11   | -7    | 7     | -2     | 10     | 1     | 5     | -1    | 1      | 1      | 2               | -1    | 2     | 5     |  |
| CDCP1                                                 | -5               | -1    | -13   | -2    | 26     | 114    | -10 | -10   | -2    | 6     | 1      | 10     | 0     | 7     | -3    | 1      | 1      | 4               | 1     | 3     | 4     |  |
| CNTN2                                                 | 0                | -3    | -13   | -3    | 24     | 71     | -8  | -10   | -9    | 2     | -3     | 7      | 2     | 6     | 1     | 2      | 3      | 3               | 0     | 1     | 1     |  |
| COL4A1                                                | -5               | -3    | -14   | -1    | 22     | 91     | -10 | -11   | -12   | 2     | -2     | 10     | 0     | 4     | 9     | 3      | 2      | 9               | -3    | 11    | 14    |  |
| CXCL13                                                | -1               | -7    | -25   | -27   | -24    | 7      | -5  | -6    | -8    | -6    | -4     | -3     | 6     | 12    | 4     | 7      | 5      | 2               | 0     | 0     | 1     |  |
| CXCL9                                                 | -2               | -4    | -14   | -7    | 16     | 65     | -6  | -10   | -11   | -4    | -6     | -2     | 2     | 6     | 1     | 3      | 4      | 4               | 0     | 1     | 0     |  |
| FLRT2                                                 | -4               | -1    | -11   | 0     | 26     | 97     | -10 | -10   | -2    | 11    | 2      | 13     | -1    | 8     | -1    | 1      | 2      | 3               | 0     | 2     | 3     |  |
| GFAP                                                  | 0                | 2     | -5    | 9     | 39     | 142    | -7  | -9    | -5    | 20    | 1      | 18     | 3     | 11    | -1    | 3      | 9      | 1               | 3     | 4     | 8     |  |
| GH                                                    | 1                | 0     | -10   | -6    | 9      | 52     | -6  | -9    | 2     | 10    | 7      | 12     | 4     | 9     | 1     | 5      | 7      | 2               | 3     | 2     | 10    |  |
| IL-12 $\beta$                                         | -2               | -13   | -34   | -40   | -32    | -24    | -7  | -11   | -14   | -18   | -9     | -15    | 3     | 8     | 0     | 3      | 4      | 3               | 0     | 1     | -4    |  |
| MOG                                                   | -2               | 0     | -10   | 1     | 23     | 83     | -7  | -9    | -1    | 13    | 2      | 12     | 1     | 6     | 1     | 3      | 3      | 1               | 2     | 1     | 3     |  |
| NfL                                                   | -3               | -6    | -11   | 2     | 29     | 110    | -11 | -9    | 1     | 4     | 3      | 12     | -4    | 4     | 0     | 2      | 2      | -3              | 6     | 1     | 6     |  |
| OPG                                                   | -2               | -4    | -13   | -5    | 18     | 94     | -6  | -9    | -8    | 1     | -1     | 5      | 1     | 6     | -1    | 2      | 2      | 2               | 0     | 1     | 1     |  |
| OPN                                                   | -4               | -5    | -18   | -13   | 1      | 47     | -6  | -16   | -27   | -24   | -26    | -26    | 0     | 5     | -1    | 3      | -1     | 2               | -2    | -2    | -8    |  |
| PRTG                                                  | -1               | -6    | -19   | -20   | -13    | -1     | -6  | -8    | -7    | -3    | -4     | -1     | 3     | 6     | 0     | 2      | 2      | 2               | 0     | 1     | 0     |  |
| SERPINA9                                              | -1               | -3    | -15   | -8    | 10     | 43     | -7  | -11   | -4    | 2     | 0      | 3      | 1     | 5     | -1    | 1      | 2      | 9               | 10    | 7     | 9     |  |
| TNFRSF10A                                             | 0                | -2    | -11   | 0     | 31     | 108    | -7  | -11   | 1     | 11    | 3      | 10     | 0     | 9     | -2    | 0      | 2      | 5               | 0     | 2     | 5     |  |
| TNFSF13B                                              | -4               | -7    | -20   | -10   | 19     | 108    | -10 | -14   | -12   | 0     | -6     | 1      | 1     | 7     | 1     | 3      | 2      | 3               | -1    | 3     | -1    |  |
| VCAN                                                  | -3               | -3    | -10   | -1    | 23     | 72     | -6  | -11   | -1    | 9     | 0      | 7      | 0     | 4     | -2    | 2      | 1      | 5               | 2     | 4     | 7     |  |

Green shading: %CV within  $\pm 20\%$ . Red shading: %CV < -20% or >20%.

**TABLE S5** Storage, processing, and stability of the MSDA Test during various freeze-thaw cycles for individual biomarkers

| Freeze-thaw cycle              |         |         |         |         |         |
|--------------------------------|---------|---------|---------|---------|---------|
| Analyte                        | Cycle 1 | Cycle 2 | Cycle 3 | Cycle 4 | Cycle 5 |
| <i>APLP1</i>                   | -6      | 6       | -13     | -5      | -7      |
| <i>CCL20</i>                   | -7      | -2      | -13     | -10     | -11     |
| <i>CD6</i>                     | -1      | 0       | -9      | -8      | -7      |
| <i>CDCP1</i>                   | -1      | -1      | -11     | -8      | -7      |
| <i>CNTN2</i>                   | 1       | 3       | -6      | -1      | -3      |
| <i>COL4A1</i>                  | 2       | 3       | -11     | -5      | -7      |
| <i>CXCL13</i>                  | -1      | -5      | -11     | -10     | -9      |
| <i>CXCL9</i>                   | -1      | 1       | -11     | -5      | -7      |
| <i>FLRT2</i>                   | -2      | -3      | -10     | -10     | -8      |
| <i>GFAP</i>                    | -9      | -4      | -20     | -23     | -28     |
| <i>GH</i>                      | -7      | 1       | -12     | -15     | -13     |
| <i>IL-12<math>\beta</math></i> | -4      | 0       | -13     | -7      | -9      |
| <i>MOG</i>                     | -3      | 1       | -11     | -7      | -9      |
| <i>NfL</i>                     | 1       | -2      | -12     | -12     | -1      |
| <i>OPG</i>                     | -1      | -3      | -11     | -6      | -8      |
| <i>OPN</i>                     | -3      | -2      | -11     | -7      | -9      |
| <i>PRTG</i>                    | -3      | -1      | -10     | -9      | -8      |
| <i>SERPINA9</i>                | 13      | -2      | -13     | -11     | -12     |
| <i>TNFRSF10A</i>               | -8      | 2       | -12     | -8      | -9      |
| <i>TNFSF13B</i>                | -1      | 0       | -9      | -4      | -7      |
| <i>VCAN</i>                    | -1      | 1       | -8      | -4      | -6      |

Green shading: average % difference within  $\pm 20\%$ . Red shading: average % difference  $< -20\%$ .



**TABLE S6** Initial study of the storage, processing, and stability of the MSDA Test at various temperatures (room temperature, 4°C, and -20°C) over time and during freeze-thaw at the Disease Activity score level

| Sample ID | -80° C | Room temperature |       |       |       |        |        | -80° C | 4°C |       |       |       |        |        | -80° C | -20 C |       |       |        |        | Sample ID | Freeze-thaw |     |     |     |     |     |
|-----------|--------|------------------|-------|-------|-------|--------|--------|--------|-----|-------|-------|-------|--------|--------|--------|-------|-------|-------|--------|--------|-----------|-------------|-----|-----|-----|-----|-----|
|           |        | 4 h              | Day 1 | Day 3 | Day 7 | Day 14 | Day 28 |        | 4 h | Day 1 | Day 3 | Day 7 | Day 14 | Day 28 |        | Day 1 | Day 3 | Day 7 | Day 14 | Day 28 |           | Fresh       | 1   | 2   | 3   | 4   | 5   |
| A         | 3      | 3                | 3     | 3     | 3     | 3      | 2.5    | 3      | 3.5 | 2.5   | 3     | 3.5   | 3.5    | 3      | 3      | 2.5   | 3     | 3.5   | 2.5    | 2.5    | E         | 5           | 5.5 | 5   | 5   | 4   | 5.5 |
| B         | 4      | 4.5              | 4.5   | 4.5   | 4.5   | 4.5    | 3.5    | 4      | 4   | 5     | 4.5   | 4.5   | 5      | 5      | 4      | 4.5   | 4.5   | 4.5   | 5      | 5      | F         | 6.5         | 7   | 6.5 | 7   | 6.5 | 7   |
| C         | 7      | 6.5              | 6     | 7     | 7     | 6.5    | 6.5    | 7      | 7   | 7.5   | 7     | 7     | 7.5    | 7      | 7      | 6     | 6.5   | 7     | 6.5    | 7      | G         | 3           | 3.5 | 3   | 3.5 | 3.5 | 3.5 |
| D         | 9      | 8.5              | 8.5   | 9     | 9     | 9      | 8.5    | 9      | 9   | 8.5   | 9     | 9     | 9      | 9      | 9      | 8.5   | 9     | 9     | 8.5    | 8.5    | H         | 2.5         | 3   | 2.5 | 2.5 | 2.5 | 3   |

Low (1.0–4.0) Disease Activity scores are noted in green, moderate (4.5–7.0) Disease Activity scores are noted in blue, and high (7.5–10.0) Disease Activity scores are noted in orange.

**TABLE S7** Follow-up study of the storage, processing, and stability of the MSDA

Test at 4°C over time at the Disease Activity score level

| Sample ID | -80°C | 4°C   |       |       |       |
|-----------|-------|-------|-------|-------|-------|
|           |       | Day 1 | Day 2 | Day 3 | Day 7 |
| A         | 8.5   | 8.5   | 8.5   | 8.5   | 8.5   |
| B         | 5     | 4.5   | 4.5   | 4.5   | 4.5   |
| C         | 7.5   | 6     | 7.5   | 7.5   | 7     |
| D         | 6.5   | 6.5   | 6.5   | 5.5   | 7     |
| E         | 5     | 5     | 5     | 5     | 5.5   |
| F         | 7     | 7     | 7     | 6.5   | 7.5   |
| G         | 5.5   | 5     | 5     | 5     | 5.5   |
| H         | 6.5   | 6.5   | 7.5   | 7.5   | 7.5   |
| I         | 6     | 6     | 6.5   | 6     | 7     |
| J         | 3.5   | 3.5   | 3     | 3.5   | 3     |
| K         | 1.5   | 1     | 1.5   | 1.5   | 1.5   |
| L         | 2.5   | 2.5   | 2.5   | 2.5   | 2     |
| M         | 2.5   | 2.5   | 3     | 2     | 3     |
| N         | 7.5   | 7.5   | 8.5   | 8     | 8     |

Low (1.0–4.0) Disease Activity scores are noted in green, moderate (4.5–7.0) Disease Activity scores are noted in blue, and high (7.5–10.0) Disease Activity scores are noted in orange.

**FIGURE S1.** Overview of PEA technology and MSDA Test format. Eighteen antibody pairs, labeled with DNA oligonucleotides, bind to target antigen in solution.

Oligonucleotides that are brought into proximity will hybridize and are extended by a DNA polymerase. This newly created piece of DNA barcode is amplified by PCR. The amount of each DNA barcode is quantified by microfluidic qPCR (Biomark™ HD, Fluidigm, Maryland Heights, MO, USA), with results reported in cycle threshold values. Data processing is then performed in the Olink® NPX Manager (Olink Proteomics, Uppsala, Sweden) software to convert the Ct values to a Normalized Protein eXpression value. The signal obtained from the assay (Normalized Protein eXpression) is converted to absolute concentration (pg/mL) using three calibrators that cover the range of sample response in the MS population (calibrators: high, middle, low) and then referenced back to the standard curve. These concentrations are then used as inputs into algorithms corresponding to disease activity and biological pathway scores.

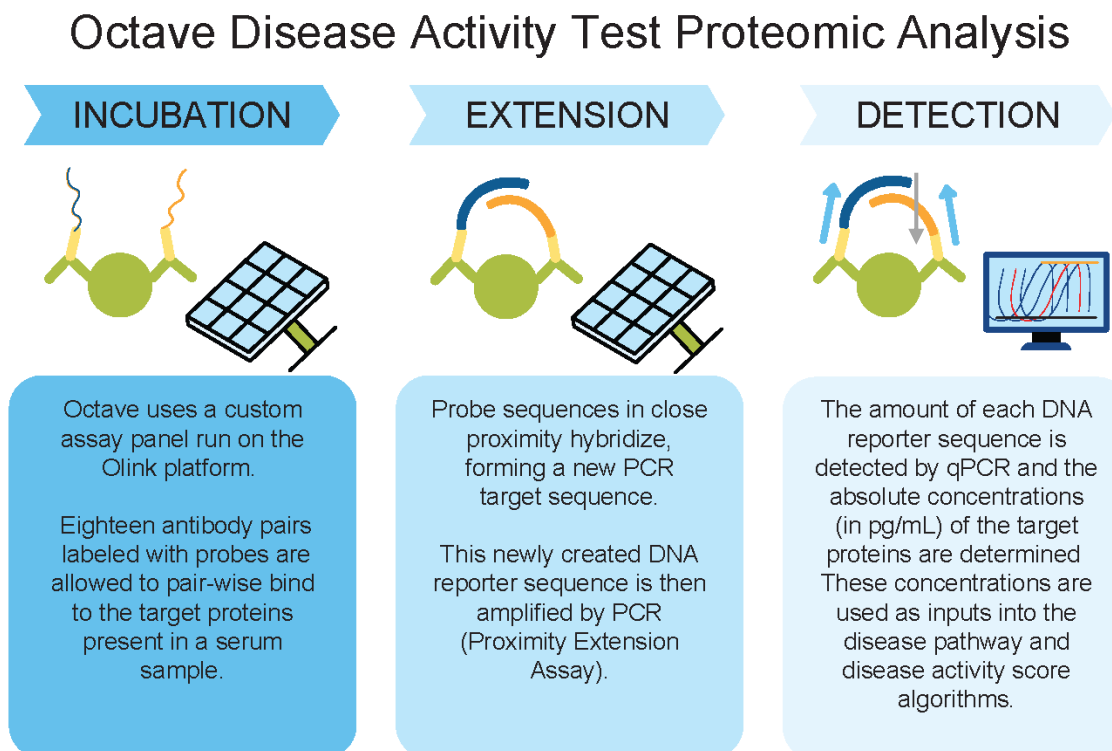

**FIGURE S2.** Assay interference using common drugs.

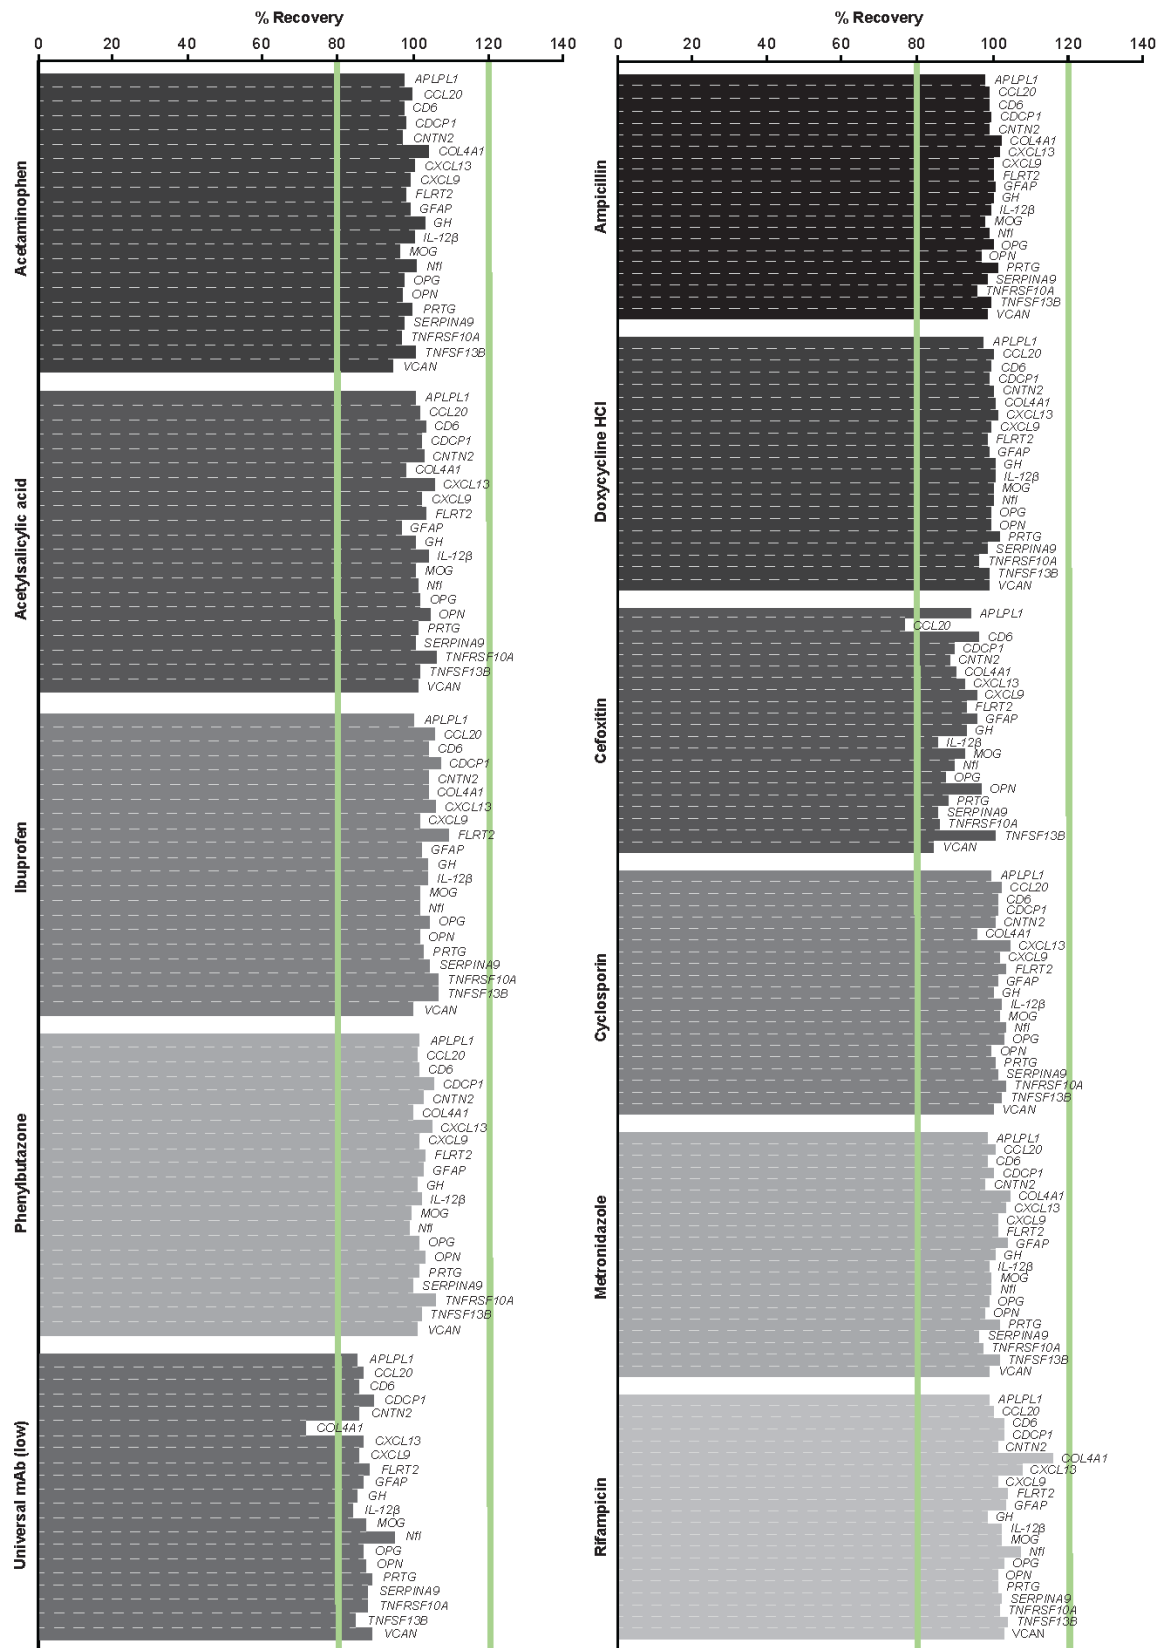

**FIGURE S3.** Assay interference using routine endogenous interferents and heterophilic antibodies.

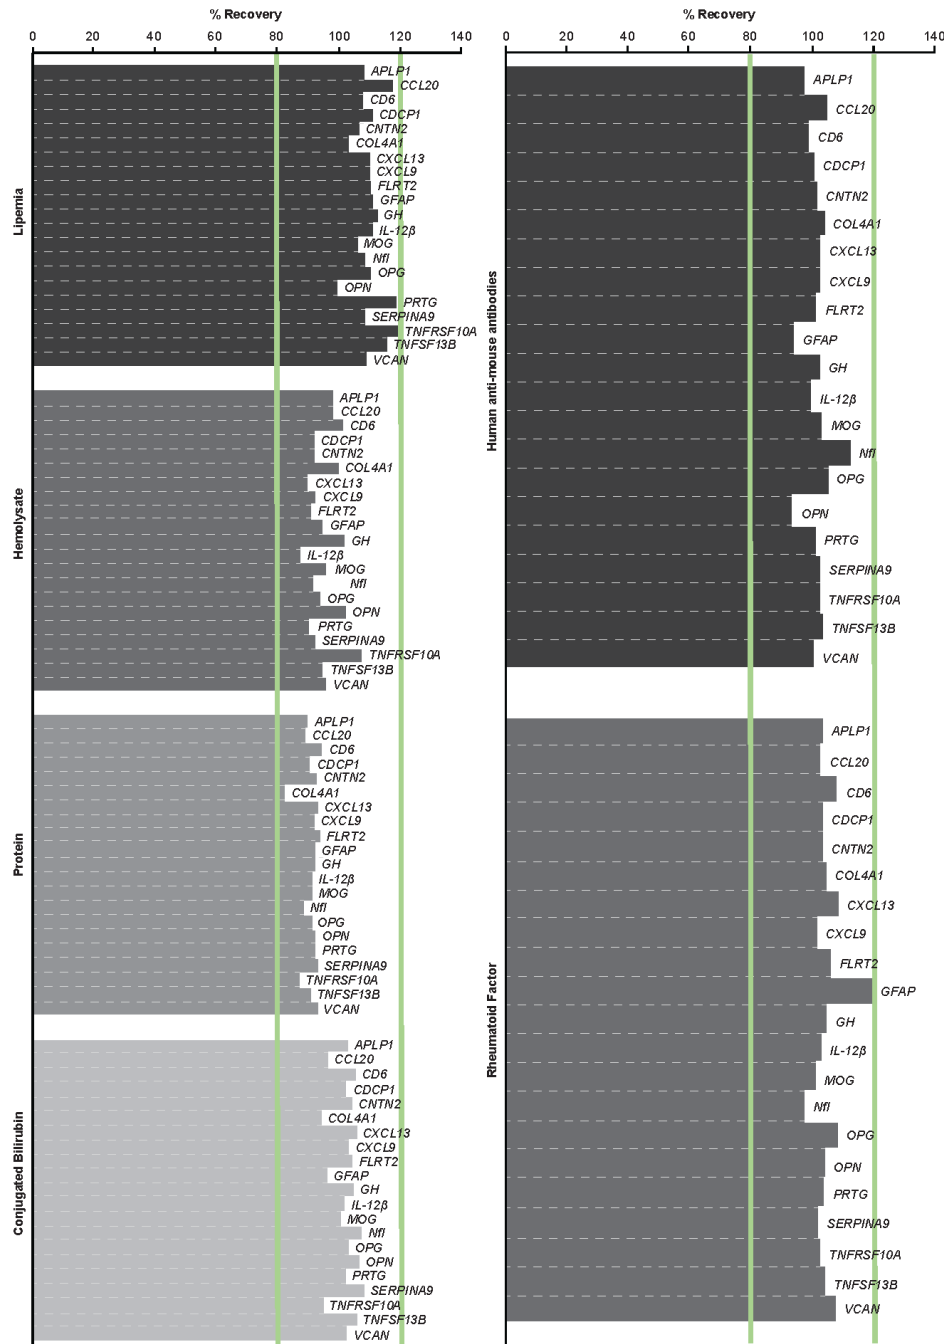

**FIGURE S4.** Percent difference of the observed protein concentration relative to the average concentration as determined from six time points (days 1, 2, 3, 4, 5, and 12) in eight samples assayed in the MSDA Test.

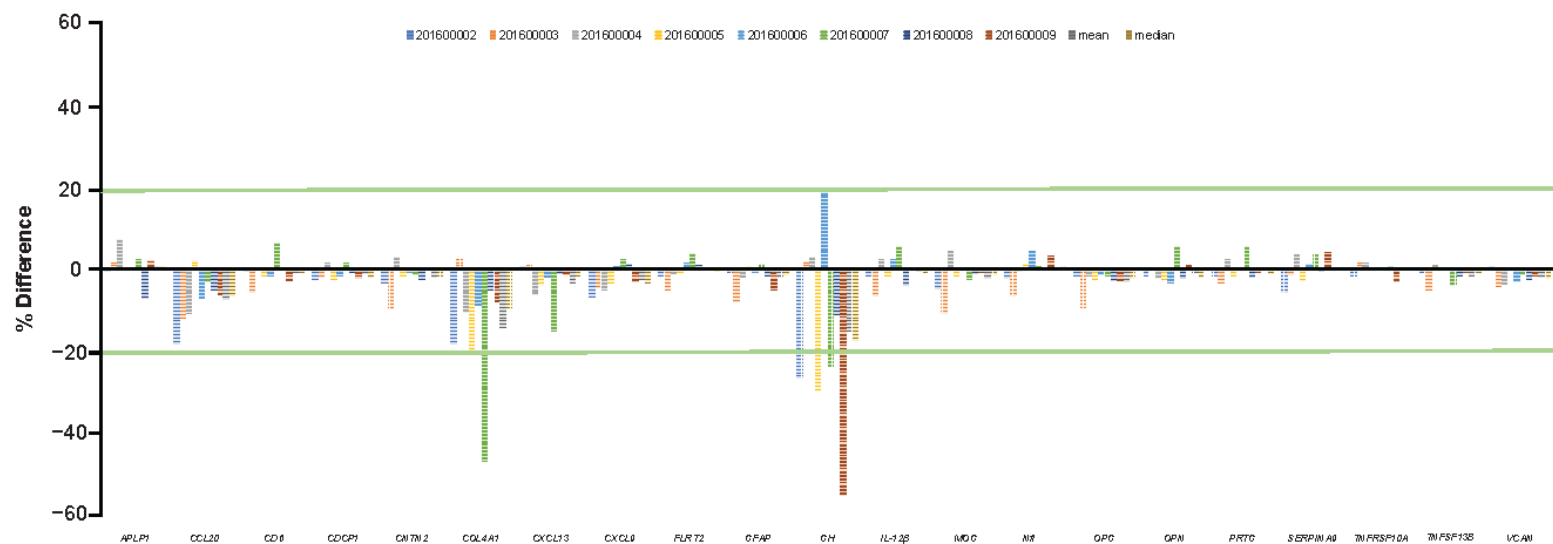

## REFERENCES

- [1] Raschka, S. (2018). MLxtend: providing machine learning and data science utilities and extensions to Python's scientific computing stack. *J Open Source Softw*, 3, 638.
- [2] Pedregosa, F., Varoquaux, G., Gramfort, A., Michel, V., Thirion, B., Grisel, O., ... Duchesnay, E. (2011). Scikit-learn: Machine learning in Python. *Journal of Machine Learning Research*, 12, 2825–2830.
- [3] Chitnis, T., Foley, J., Ionete, C., El Ayoubi, N., Saxena, S., Gaitan-Walsh, P., ... Khoury, S. J. Clinical validation study results of a multivariate proteomic serum based assay for disease activity assessments in multiple sclerosis. Presented at: 37<sup>th</sup> Congress of the European Committee for Treatment and Research in Multiple Sclerosis (ECTRIMS); October 13-15, 2021; Virtual.
- [4] Seabold, S., Perktold, J. (2010). Statsmodels: Econometric and statistical modeling with Python. *Proceedings of the 9th Python in Science Conference*, 92–96.
